# Supplementary material for: Assessing the Impacts of Land Use and Land Cover-Based Drought Adaptation Measures with an Eco-Hydrological Model
Source: Copernicus journal article supplement (doi:10.5194/egusphere-2025-5221), 2025-12-02
Supplement: Supplementary file [file egusphere-2025-5221-RC1-supplement.pdf]

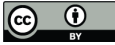

# Assessing the Impacts of Land Use and Land Cover-Based Drought Adaptation Measures with an Eco-Hydrological Model

Sven F. Grantz<sup>1</sup>, Paul D. Wagner<sup>1</sup>, Jens Kiesel<sup>1,2</sup>, Nicola Fohrer<sup>1</sup>

5 <sup>1</sup> Department of Hydrology and Water Resources Management, Institute for Natural Resource Conservation, Kiel University, Kiel, Germany

<sup>2</sup> Stone Environmental, 535 Stone Cutters Way, Montpelier, VT 05602, USA

Correspondence to: sgrantz@hydrology.uni-kiel.de

**Abstract.** Europe has warmed by about 1.5 °C above pre-industrial levels and endured record-breaking droughts  
10 from 2018–2020, underscoring the need for adaptation to water scarcity. This study examines the potential of targeted land use and land cover (LULC) changes to modify water fluxes and soil moisture storage for greater hydrologic drought resilience. Evaluated measures comprise replacing grain corn with sorghum on agricultural fields, converting coniferous forests (spruce, pine) to broadleaved stands (beech, oak), and mitigating imperviousness in built-up areas.

15 The study area, the 1,983 km<sup>2</sup> Upper Lippe catchment in Germany, and the exceptionally dry period of 2011–2020, are suitable conditions to address the research question for a temperate region. The assessment was conducted with the eco-hydrological model SWAT+ and novel approaches were implemented to accurately parameterize agricultural land use and management, dominant tree species, and the realistic impervious fraction of built-up areas within the model using publicly available existing data products and studies. After applying a  
20 calibration strategy that specifically targeted low-flow periods, the model performs well in the study period combining a good representation of low-flow periods with a standardized Root Mean Square Error for flows exceeding a 70 % probability threshold of 0.14 and while also maintaining robust overall streamflow dynamics with a modified Kling-Gupta Efficiency (KGE') of 0.90 at the catchment outlet. The parameterization and calibration approaches can serve as references for model setups addressing similar ecoregions and research  
25 questions.

In the adapted agricultural areas, the **evapotranspiration coefficient** decreased by -11.7 percentage points (pp, **area weighted median of the annual average**) with reductions concentrated in the vegetation period leading to increases in soil moisture content. In response, the drainage **flow coefficient** increased by +3.3 pp with increases concentrated in the winter months and the groundwater recharge coefficient increased by +4.8 pp with a relatively  
30 uniform distribution throughout the year. The evapotranspiration coefficient from the adapted forested areas was reduced by -15.9 pp (from 67.5 %) with reductions occurring outside of the summer months. Here, increased soil moisture content increases the lateral flow coefficient by +9.0 pp and the groundwater recharge coefficient by 3.8 pp. Surface runoff increases only slightly, with enhanced surface runoff primarily occurring in mountainous areas where broadleaf trees provide less rainfall interception during winter dormancy. In the adapted built-up areas,  
35 reductions in impervious surfaces led to an increased groundwater recharge coefficient (+ 0.4 pp) and a decreased surface runoff coefficient (-3.6 pp), while the evapotranspiration coefficient increased (+2 pp), particularly in summer. Plant-available moisture in the topsoil increased in the adapted agricultural and forested areas across all modeled adaptation measures, reducing magnitude and duration of water stressed periods. These results

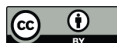

demonstrate that LULC adaptations can shift landscape water balance by reducing evapotranspiration and  
40 increasing infiltration, thereby strengthening drought resilience and offering co-benefits such as urban cooling.  
Such insights can guide policy and land management toward scalable, land use-based solutions for extreme  
weather resilience under a warming global climate.

## 1 Introduction

Increased atmospheric temperature alters the hydrologic and energy cycles of the earth (Srivastav et al., 2021) and  
45 influences the frequency, duration, intensity and spatial extent of extreme weather events such as heavy rainfall  
and prolonged periods of drought on the global scale. Europe is the fastest warming continent (European  
Environment Agency, 2024) and the frequency, intensity and duration of heatwaves have increased with the  
observed climate change in the past (Lorenz et al., 2019). Between 2006 and 2015, temperatures in Europe were  
50 already about 1.5 °C higher compared to the pre-industrial level (European Environment Agency, 2017) and the  
continent has experienced extreme drought conditions from 2018 to 2020 which occurred with unprecedented  
intensity (Boergens et al., 2020; Hari et al., 2020; Rakovec et al., 2022) providing further evidence that droughts  
are exacerbated by climate change (Hari et al., 2020; Samaniego et al., 2018; Field et al., 2012). The variability in  
rainfall as well as the frequency and magnitude of droughts are predicted to increase further depending on the  
55 extent of global warming and its regional effects (Field et al., 2012; Samaniego et al., 2018; Hari et al., 2020;  
Grillakis, 2019) which poses major challenges to water management, agricultural productivity and ecologic  
communities. Land use change has noticeable effects on water balance components such as runoff and water  
retention in storages such as soils and aquifers (Herrmann and Wendland, 2021; Wagner et al., 2023). As a result,  
they also affect droughts and floods and are therefore part of the problem of hydrologic extremes as well as part  
of the solution to their mitigation (Auerswald et al., 2024). Consistent with these findings, the first German  
60 National Water Strategy from 2023 defines both a natural water balance and a climate adapted and water-efficient  
land use in agricultural, forested and built-up areas as key strategic goals (Bundesministerium für Umwelt und  
Naturschutz, nukleare Sicherheit und Verbraucherschutz, 2023). This study contributes to the knowledge base for  
land management and policy by investigating the hydrologic impacts of scalable, land use-based solutions aimed  
at enhancing drought resilience by increasing water retention in the landscape.

65 Droughts refer to periods of time with reduced water availability (Mishra and Singh, 2010) originating from  
substantially below-average climatic water balances driven by low precipitation and high temperatures resulting  
in negative impacts for various components of natural systems and socio-economic sectors (Ault, 2020; Wilhite et  
al., 2017). Depending on their duration, droughts propagate from meteorological phenomena to soil moisture  
droughts, during which plants experience water stress – also termed agricultural droughts when crop production is  
70 affected – and hydrologic droughts, marked by relatively low surface and groundwater levels as well as reduced  
streamflow (van Loon, 2015; Menzel, 2016) as drainage from storages in the affected catchments is not sufficiently  
replenished.

A fundamental aspect of a system's resilience is its capacity to absorb disturbances while maintaining essential  
structure and function (Holling, 1973; Walker et al., 2004). In this study, droughts constitute disturbances and the  
75 central function of a hydrologic system that needs to persist is its provisioning of water to connected systems. In  
particular, consistent streamflow and water levels as well as groundwater recharge affect socio-economic water  
supply (Marx et al., 2018; van Vliet et al., 2016) and aquatic habitats (Riedel et al., 2021; Kakouei et al., 2018).

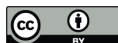

Sufficient soil water content on the other hand has impacts on agricultural and forestry productivity (Jarrett et al., 2023) and terrestrial ecosystems (Salomón et al., 2022). Drought resilience of a hydrologic system is therefore the  
80 degree to which it provides sufficient water to meet the requirements of the socio-economic and ecological systems to which it is connected during periods of relative water scarcity and thus avoiding a propagation of the drought. The stabilization of water availability under drought conditions can be promoted by slowing down runoff processes, increasing the natural or artificial storage volume in the catchment and improving [water efficiency](#) of the dependent systems. In this study, we assessed the potential of land use and land cover (LULC, in this  
85 publication universally referred to as “land use”) to increasing water retention in the landscape by reducing evapotranspiration and strengthening water fluxes through storages with long or medium residence times. Specifically, we investigated which hydrologic alterations are caused by adaptations in agricultural, forested, and built-up areas in a study period dominated by dry and extremely dry meteorological conditions as identified with the Standardized Precipitation and Evaporation Index (SPEI).

90 To assess the hydrologic impacts and the effectiveness of climate adaptation measures, field experiments as well as modeling studies can be used (Meyer et al., 2019). Hydrological models allow to understand the interactions of climate, topography, soil and land cover and their impacts on the water balance on the catchment scale, as well as to assess possible outcomes of land management strategies under different climatic conditions (Čerkasova et al., 2023; Parajuli et al., 2016; Kiniry et al., 2008). Therefore, modeling approaches are frequently used as an  
95 alternative or in addition to empirical studies (Liang et al., 2023). With their ability to model scenarios for large areas, modeling can assist policy design and administration (Čerkasova et al., 2023). Comprehensive eco-hydrological models like the Soil and Water Assessment Tool (SWAT) are particularly suited to assess the effects of land use-based climate adaptation measures on the landscape water balance, as they are capable of accurately representing different plants within the same land use class and evaluating how management and conservation  
100 practices affect water resources on the landscape scale (Čerkasova et al., 2023). In this study, SWAT+ (Arnold et al., 1998; Bieger et al., 2017) the latest, extensively restructured version of the model SWAT (Arnold et al., 1998) was used to assess changes in the water balance of the adapted areas in the upper Lippe catchment in Germany. SWAT has already been successfully used to model the effects of various land use and management practices under different climate change scenarios (Parajuli et al., 2016; Bernini et al., 2023; Berihun et al., 2023; Hoque et al., 2014). A small number of studies investigate the effects of changes in isolated land use or land management  
105 categories (e.g. Yang et al., 2024; Eini et al., 2023; Gautam and Corzo, 2023; Kassaye et al., 2024; Nauta et al., 2024; Paez-Trujillo et al., 2023; Naik and Abiodun, 2024) on the water retention capacity for drought management with SWAT+. In this study, we follow a comprehensive approach by assessing adaptations in the three main land use categories agriculture (corn to sorghum), forested (coniferous to broad-leafed trees) and built-up areas  
110 (reduction of imperviousness). With detailed spatial discretization and model parameterization, a realistic representation of the current state of these areas was established and changes are analyzed separately for the distinct land uses across the different site conditions to investigate their respective potential as measures for increasing drought resilience.



## 2 Materials and Methods

### 115 2.1 Catchment description

The study area is the upper Lippe catchment limited by the gauging station Kessler 3 which is situated 152.9 km upstream from the Lippe's confluence with the Rhine River. It comprises an area of 1,983.6 km<sup>2</sup> and accounts for 41 % of the entire Lippe catchment which is located in the state of North Rhine Westphalia in the West of Germany. The mean discharge of the river at the outlet of the study catchment at 63,6 m.a.s.l is 22,2 m<sup>3</sup>/s (1991-2020) with a coefficient of variability of 79 % (Ministerium für Umwelt, Naturschutz und Verkehr NRW, 2024). The mean elevation of the upper Lippe catchment is 213.6 m.a.s.l with a minimum elevation of 35.7 m.a.s.l and a maximum elevation of 614.4 m.a.s.l comprising both mid-range mountain and lowland areas as shown in Fig. 1a. The study area has a population size of 451,387 according to the census 2022 (Statistisches Bundesamt - Destatis, 2023) resulting in a population density of 227 inhabitants per km<sup>2</sup>.

125 Land use of the study area shown in Fig. 1b is dominated by agriculture with 51 % of the catchment being used as rainfed agricultural land and 13 % as grassland (European Environment Agency, 2020a). The most frequently cultivated crops are corn, winter grains (barley and wheat), and rapeseed, which are mainly grown in rotation, with some corn monocultures still prevalent (Landwirtschaftskammer Nordrhein-Westfalen, 2023). Forests in the upper Lippe catchment cover 24 % of the area and spruce and beech dominate in the mid-range mountains where the eastern and south-eastern headwaters of the Lippe are situated (Blickensdörfer et al., 2024). In the lowlands, oak is dominant throughout the catchment while the region in the north-east of the catchment contains a distinct pine agglomeration (Blickensdörfer et al., 2024). Built up-areas account for 9 % of the study area and are used for settlements (7 %) as well as industrial and commercial purposes including transportation (2 %). There are 25 reservoirs located in the upper Lippe catchment with a total retention volume of approximately 2,500 million m<sup>3</sup> which are mainly operated for flood control and some water supply purposes (Wasserverband Obere Lippe, 2024). The soils of the upper Lippe catchment (Geologischer Dienst NRW, 2023) are dominated by loamy and textures south of the Lippe River and in the eastern mid-range mountains (Fig. 1c) with higher runoff and lower infiltration potential. The lowlands of the Westphalian Basin north of the Lippe River are in contrast dominated by sandy loam and loamy sand soils with medium infiltration potential while the sandy soils of the region in the north-east have the highest infiltration potential.

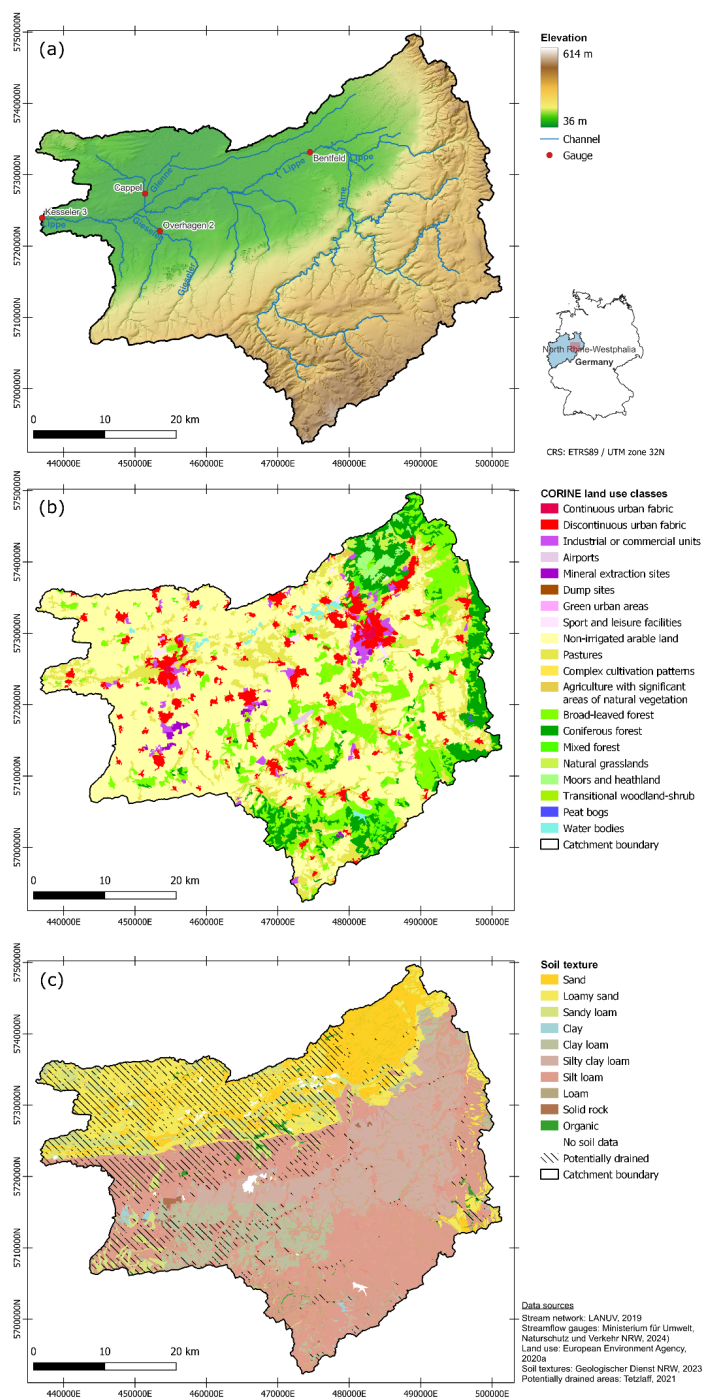

**Figure 1: (a) Topography with stream network (LANUV, 2019) and streamflow gauges (Ministerium für Umwelt, Naturschutz und Verkehr NRW, 2024), (b) spatial distribution of CORINE 2018 land use classes (European Environment Agency, 2020a), (c) soil textures (Geologischer Dienst NRW, 2023) and potentially drained areas (Tetzlaff, 2021) of the upper Lippe catchment**



## 2.2 Meteorological input data and climatic trend analysis

We used daily precipitation and temperature data from the HYRAS data set – a **high-resolution** gridded observational weather dataset for Central Europe (Razafimaharo et al., 2020; Rauthe et al., 2013) provided by the German Weather Service (Deutscher Wetterdienst, 2022). We conducted statistical tests on the annually aggregated weather data to identify potential climate trends in the period from 1991 to 2020 (Fig. 2). The Mann-Kendall trend tests (Mann, 1945; Kendall, 1955), **conducted with the R-package “trend”** (Pohlert, 2023) showed that the null hypotheses for no trends in precipitation ( $p$ -value = 0.008) and average temperatures ( $p$ -value = 0.010) can be rejected with statistical significance. Annual precipitation sums exhibit a negative trend with a Sen’s slope (Sen, 1968) of -8.48 mm / year while annual average temperatures are rising with a Sen’s slope of 0.034 °C / year.

150

155

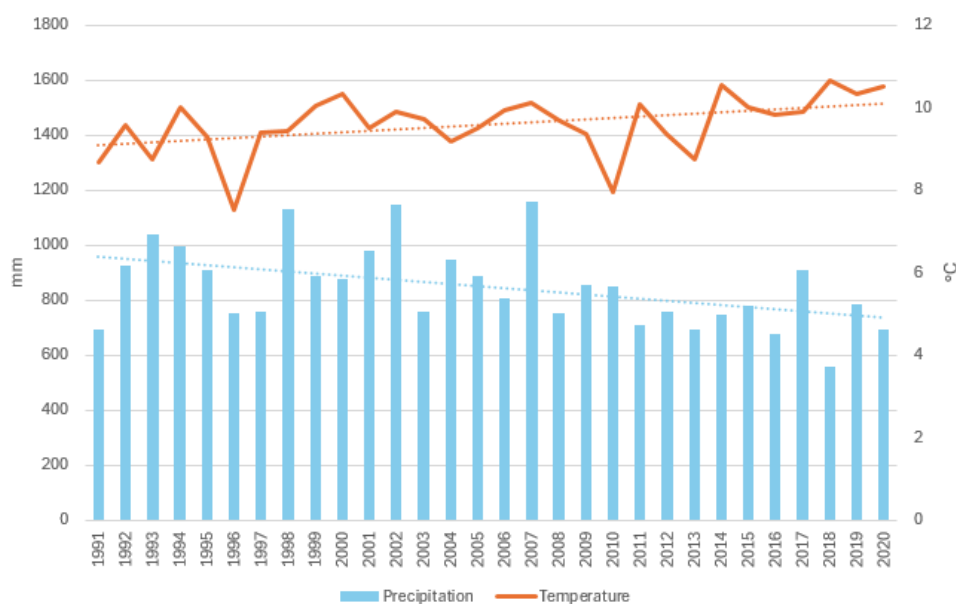

**Figure 2: Climate trends in the upper Lippe Catchment (1991 – 2020) with linear trendlines and Sen’s slopes**

The Standardized Precipitation-Evaporation Index (SPEI) is a statistical indicator that identifies dry and wet periods based on the climatic water balance as the difference between total precipitation and the sum of potential evaporation aggregated on different time scales (Vicente-Serrano et al., 2010). It builds on the concept of the Standardized Precipitation Index (SPI) developed by McKee et al. (1993) but captures water deficits or water surpluses of the land surface better by considering the **impact of temperature variability** on evaporative water demand while preserving the robust statistical features of the SPI. Like the SPI, the SPEI can be calculated on a range of timescales from 1-48 months. **We analyzed the SPEI for the upper Lippe Catchment with the R package “SPEI”** (Beguería and Vicente-Serrano, 2023) with an aggregation period of 12 months and potential evaporation calculated with the **Hargreaves method** (Fig. 3). This analysis shows that the period following 2009 was almost exclusively characterized by relative dryness.

160

165

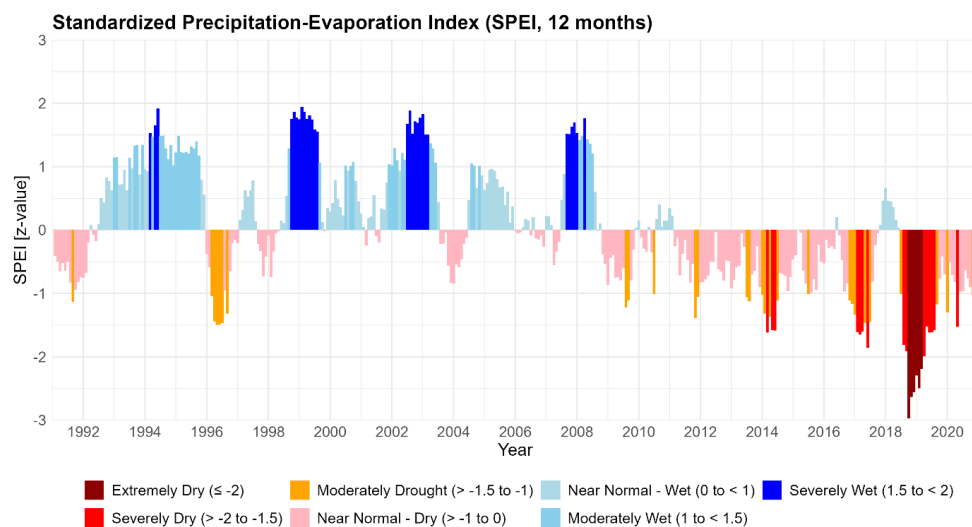

170 **Figure 3: Standardized Precipitation-Evaporation Index (12 months) – upper Lippe Catchment, 1991 – 2020 with SPEI thresholds from Deutscher Wetterdienst (n.d.)**

## 2.2 Eco-hydrological Model

The eco-hydrological model SWAT+ (Arnold et al., 1998; Bieger and Arnold, 2017), of which we used version 60.5.4, is a completely revised version of the SWAT model (Arnold et al., 1998; Arnold and Fohrer, 2005). It divides the catchment into subcatchments which contain a channel and are further divided into Hydrologic  
175 Response Units (HRUs) – spatial entities with unique soil, land use and slope combinations. For each HRU, changes in soil water storage along with the processes of evaporation, surface runoff, lateral and drainage flow as well as percolation are calculated on a daily time step. Water leaving the HRUs via surface runoff, lateral and drainage flow is directly received by the modeled channel where the water is routed to the subcatchment outlet. Water percolating from HRUs enters shallow aquifers and – after optional subtraction of losses to a deep aquifer  
180 or due to capillary rise and plant uptake – discharged as groundwater flow to the respective channel.

For the delineation of the catchment and the derivation of slope classes, a digital elevation model (DEM) with a 10 m resolution (Fig. 1a) resampled with bilinear interpolation from a 1 m raster dataset (Landesvermessung NRW, 2023) was used. Four slope classes were defined with class borders based on the USDA Soil Survey Manual (United States Department of Agriculture, 2017) at 3 %, 8 % and 16 %. A river network map based on the official  
185 water bodies map of North Rhine-Westphalia (LANUV, 2019) was used and the threshold for stream and channel definition was set to 25 km<sup>2</sup> resulting in the modeled river network shown Fig. 1a. A soil map with a resolution of 1:50,000 and soil parameters produced in accordance with the German soil mapping guidelines of the Bundesanstalt für Geowissenschaften und Rohstoffe (2005) by the State Geological Service of North Rhine-Westphalia (2023) were used as model inputs (Fig. 1c). The soil hydrologic groups additionally required by the  
190 SWAT+ model were estimated with pedotransfer functions in accordance with United States Department of Agriculture (2009) specifications. The HRU generation considered land uses accounting for more than 2 %, soils for more than 11 % and slope classes for more than 10 % of each subcatchment to filter out very small unique combinations. The areas of the filtered HRUs were redistributed proportionately to the generated HRUs within each subcatchment.



195 The weather data used as input to the model were daily minimum and maximum temperature (Razafimaharo et al.,  
2020) and daily precipitation (Rauthe et al., 2013) from the above described HYRAS dataset. Potential  
evapotranspiration was calculated with the method of Hargreaves and Samani (1985).

### 2.2.1 Land use classification and parameterization

200 The models' land use data comprises combined information from several datasets. [The CORINE Land Cover 2018](#)  
product with a minimum threshold of 25 ha for areas to be categorized as singular land use units (European  
Environment Agency, 2020a) serves as a base layer (Fig. 1b). A more detailed spatial representation and  
parametrization of agricultural land use and the identification of common crop rotations were derived from data  
of the Integrated Administration and Control System (IACS) for the implementation of the European Union's  
205 Common Agricultural Policy (CAP). This database is used as a basis for EU grant processing and contains annual  
data on crops on the field scale. For the Lippe catchment this high-resolution dataset was provided for the years  
2016 to 2022 by the Chamber of Agriculture of North Rhine-Westphalia (Landwirtschaftskammer Nordrhein-  
Westfalen, 2023). This complex approach allowed for accurate spatial representation of the current agricultural  
land use on the field scale combined with generalized crop rotation schedules that are conducive to exploring land  
use scenarios.

210 The modeled crop rotations with sowing and harvesting as well as tillage operations were added as management  
schedules. Management operations for grain sorghum are based on the information of field trials in Germany  
(Bayerische Landesanstalt für Landwirtschaft, 2024). Harvesting and tillage parameters (Appendix 1, Tables A1  
and A2) were adjusted according to standard German agricultural practices (Kuratorium für Technik und  
Bauwesen in der Landwirtschaft, 2009). The planting and sowing dates were adjusted based on phenology data  
215 from the German Weather Service (Deutscher Wetterdienst, 2023). Management operation dates and parameters  
were subsequently verified and adjusted based on the regional conditions and common practices derived from an  
expert interview with the Chamber of Agriculture of North Rhine-Westphalia (2024). In the model, cover crops  
are uniformly represented by red clover. According to regional practices, cover crops are planted before corn in  
all crop rotations while no cover crops are planted with corn monocultures. The final management schedule of the  
220 model contains the operations shown in Table A3 of Annex 1.

Drainages are represented in the model based on the spatial distribution of [potentially drained](#) areas in North Rhine-  
Westphalia estimated by Tetzlaff (2021) and shown in Fig. 1c. Agricultural fields that were at least 30 %  
potentially drained were classified as tile drained. To calculate drainage flow, the original tile drainage equation  
of SWAT is used (Neitsch et al., 2011). This method considers the perched water table and simulates the tile flow  
225 on days when the height of the perched water table layer is greater than the height of the tile (Du et al., 2005). It  
considers the following three user defined parameters in SWAT+ (v. 60.5.4). The depth of the tile drainages was  
set to 800 mm in accordance with the assumptions of a water balance model for North Rhine-Westphalia  
(Herrmann and Wendland, 2021) which were confirmed as generally plausible by the Chamber of Agriculture of  
North Rhine-Westphalia (2024). The time to drain the soil to field capacity in hours and the maximum daily  
230 drainage capacity in millimeters are used as calibration parameters.

As a basis for the modeling adaptation in forested areas we further refined the spatial representation and  
parameterization of forests in the model. For areas classified as forested in the CORINE 2018 land cover map  
(European Environment Agency, 2020a) the most prevalent tree species groups were identified based on a map  
product from the Thünen-Institut (Blickensdörfer et al., 2022). This novel dataset combines remote sensing time





235 series (Sentinel-1 and -2) with sample-based data from the German National Forest Inventory and environmental  
data to generate a map of dominant tree species covering the whole German territory with a spatial resolution of  
10 m (Blickensdörfer et al., 2024). Several studies have shown that the default SWAT plant database is insufficient  
to correctly model the water balance of forested areas (Haas et al., 2022; Karki et al., 2023; Yang and Zhang,  
2016). Therefore, SWAT+ tree parameters for oak (*Quercus spp.*), beech (*Fagus sylvatica*), birch (*Betula spp.*),  
240 pine (*Pinus spp.*), spruce (*Picea spp.*) and douglas fir (*Pseudotsuga menziesii*) identified for Germany and  
published by Müller (2022) were used in this study.

The model setup for this study distinguishes the two land use classes of partially impervious built-up areas which  
were delineated based on the CORINE 2018 land cover map. The model's "settlements" class comprises the  
CORINE land cover classes Continuous Urban Fabric, Discontinuous Urban Fabric, Green Urban Areas, Sport  
245 and Leisure Facilities. Areas in the CORINE classes Industrial or Commercial Units as well as transport classes  
are lumped in the model's "industry and commerce" class. The model calculates runoff based on the SCS Curve  
Number Method (USDA Soil Conservation Service, 1972) and assigns an SCS curve number of 98 to the fraction  
of impervious surfaces while the hydrologic properties of the unsealed fraction is calculated based on its land use  
and soil type (Neitsch et al., 2011). To achieve a realistic representation of the built-up areas in the model, the  
250 fraction of impervious surfaces has been identified using a map product containing information on imperviousness  
density (European Environment Agency, 2020b). This raster dataset contains estimates of impermeable cover of  
soil for Europe at a resolution of 10 m derived from analysis of Sentinel-2 satellite imagery. The identified mean  
impervious fractions in the study catchment are 0.46 for settlements and 0.58 for industrial and commercial areas,  
respectively.

### 255 2.2.2 Model calibration and validation

The aim of the calibration strategy was to optimize the water balance and discharge dynamics of the entire upper  
Lippe catchment with a particular focus on low-flow periods. Thus, the observed daily average discharge at the  
catchment outlet at gauge Kessler 3 (Fig. 1a) from 2001 to 2020 (Ministerium für Umwelt, Naturschutz und  
Verkehr NRW, 2024) was used for the calibration of the SWAT+ model of the upper Lippe catchment. Further  
260 discharge measurements at the station Bentfeld as well as the subcatchments of the Gieseler with gauge Overhagen  
2 and of the Glenne gauged at Cappel (Fig. 1a) are used for additional spatially distributed model validation. Due  
to the above identified decreasing trend in precipitation, the calibration and validation periods were defined to  
equally include wet and dry years (Table 1).

265 **Table 1: Separation of the calibration and validation periods**

|                                              | Calibration Period                                            | Validation Period                                             |
|----------------------------------------------|---------------------------------------------------------------|---------------------------------------------------------------|
| Years (sorted by precipitation, high to low) | 2007, 2018, 2004, 2013, 2005,<br>2014, 2010, 2003, 2019, 2015 | 2002, 2016, 2001, 2020, 2017,<br>2011, 2009, 2008, 2006, 2012 |
| Average annual precipitation                 | 814 mm                                                        | 827 mm                                                        |
| Standard deviation of precipitation          | 153 mm                                                        | 141 mm                                                        |

In an initial step, the model's bias between observed and simulated discharge was assessed to evaluate the  
plausibility of the water balance. The applied performance metric was Percent Bias (PBIAS), which quantifies the  
deviation between observed and simulated datasets as a percentage where positive PBIAS values indicate model



270 overestimation and negative values signify underestimation (Yapo et al., 1996; Sorooshian et al., 1993). Initially, the SWAT+ model of the upper Lippe catchment exhibited an underestimation of the modeled streamflow with a PBIAS of -33.8 in the calibration period at the catchment outlet (gauge Kessler 3). The recharge coefficient to the deep aquifer which represents losses from the system (Neitsch et al., 2011) and was set to 0 (SWAT+ default value = 0.05) assuming that no water is lost from the catchment resulting in a PBIAS of -29.3. To adjust the

275 evapotranspiration with the aim to achieve plausible runoff quantities, here defined as  $-10 \leq \text{PBIAS} \leq 10$ , before automatic calibration, the calibration coefficient of the Hargreaves potential evaporation equation (Hargreaves and Samani, 1985) was adjusted to 0.0018 resulting in a PBIAS of -9.9.

Following these preliminary manual parameter adjustments 19,200 parameter sets were generated by Latin Hypercube Sampling (Soetaert and Petzoldt, 2010; McKay, 1988; McKay et al., 2000) using the parameter ranges

280 shown in Table 2 for automatic calibration. The selected calibration parameters cover the models' relevant conceptualized components of the hydrologic cycle including evaporationtranspiration (*esco*, *epco*) surface runoff (*surlag*, *cn2*, *cn3\_swf*), lateral flow (*latq\_co*), tile flow (*tile\_dtime*, *tile\_drain*) as well as groundwater recharge (*perco*) and retention (*alpha*). The parameter set furthermore comprises the physical properties of the soil (*bd*, *awc*, *k*) as well as of the aquifer's specific yield (*sp\_yield*). The parameter ranges for the conceptual parameters *esco*,

285 *epco*, *latq\_co* and *perco* extent to the maximum possible ranges of the SWAT+ model while the minima and maxima of the remaining parameters were limited based on prior sensitivity tests. For each parameter set a model run was performed.

The modified Kling-Gupta Efficiency (KGE') was applied as the first objective function for attaining a good model representation of overall streamflow dynamics as it optimizes the Euclidian distance in a three-dimensional

290 parameter space between the correlation coefficient, the bias ratio and the variability ratio (Kling et al., 2012). It has been found by Kling et al. (2012) to be superior to the widely used Nash-Sutcliffe Efficiency (NSE, Nash and Sutcliffe, 1970) which will only be considered here as additional information on model performance. The second objective function was the low-flow performance of the model measured by the Root Mean Square Error standardized using the standard deviation of the overserved discharge (Moriassi et al., 2007) applied to the low-

295 flow segment of the flow duration curve (Pfannerstill et al., 2014; Haas et al., 2016). In contrast to Haas et al. (2016) the low-flow segment in this calibration comprises flows with an exceedance probability of 70 % as categorized by Yilmaz et al. (2008) to lump both low- and very low-flows in one performance metric (RSR\_Q70). Firstly, the 99th percentile of the model runs, sorted by KGE', were selected. Secondly, the selected runs were then ranked by RSR\_Q70 to determine the optimal parameter set in accordance with the calibration strategy.

300 Calibration and validation were carried out in R using the packages FME (Soetaert and Petzoldt, 2010) and SWATrunR (Schuerz, 2024) for Latin Hypercube Sampling and hydroGOF (Zambrano-Bigiarini, 2024) for model evaluation and the packages zoo (Zeileis and Grothendieck, 2005) and xts (Ryan et al., 2024) for data processing.



**Table 2: Calibration parameters, upper and lower boundaries and final values/adjustments**

| Parameter  | Description                                                              | Change              | Min   | Max | Final change value |
|------------|--------------------------------------------------------------------------|---------------------|-------|-----|--------------------|
| surlag     | Surface runoff lag coefficient                                           | absval <sup>1</sup> | 0.05  | 1   | 0.051              |
| cn2        | Condition II curve number                                                | abschg <sup>2</sup> | -30   | 2   | -4.678             |
| cn3_swf    | Soil water factor for curve number condition III                         | absval <sup>1</sup> | 0     | 1   | 0.468              |
| esco       | Soil evaporation compensation coefficient                                | absval <sup>1</sup> | 0     | 1   | 0.341              |
| epco       | Plant water uptake compensation coefficient                              | absval <sup>1</sup> | 0     | 1   | 0.945              |
| awc        | Available water capacity of the soil layer (mm H <sub>2</sub> O/mm soil) | pctchg <sup>3</sup> | -20   | 20  | 13.647             |
| k          | Saturated hydraulic conductivity of soil layer (mm H <sub>2</sub> O/hr)  | pctchg <sup>3</sup> | -50   | 50  | 38.602             |
| bd         | Bulk density of soil layer (Mg/m <sup>3</sup> or g/cm <sup>3</sup> )     | pctchg <sup>3</sup> | -30   | 20  | 10.615             |
| latq_co    | Lateral flow coefficient                                                 | absval <sup>1</sup> | 0     | 1   | 0.461              |
| tile_dtime | Time to drain soil to field capacity (hrs)                               | absval <sup>1</sup> | 48    | 72  | 50.200             |
| tile_drain | Maximum drainage capacity per day (mm)                                   | absval <sup>1</sup> | 10    | 51  | 32.951             |
| perco      | Percolation coefficient                                                  | absval <sup>1</sup> | 0     | 1   | 0.610              |
| alpha      | Baseflow recession constant                                              | absval <sup>1</sup> | 0.001 | 0.2 | 0.007              |
| sp_yld     | Aquifer specific yield (m <sup>3</sup> H <sub>2</sub> O/m <sup>3</sup> ) | absval <sup>1</sup> | 0.05  | 0.2 | 0.081              |

305 <sup>1</sup> *absval* replaces the initial parameter value with an absolute value.

<sup>2</sup> *abschg* adds an absolute value to the initial parameter value.

<sup>3</sup> *pctchg* changes the initial parameter value by a percentage.

### 2.3 Land use scenarios

310 To assess the hydrologic effects of climate adaptation measures, an alternative land use scenario was created which comprises three different adaptation categories affecting five land use classes:

- 315 1. Crop adaptation: To model the effects of this adaptation in the study catchment, agricultural areas where grain corn [*Zea mays* L.] is cultivated – either as monoculture or as part of crop rotations – it is replaced by grain sorghum [*Sorghum bicolor* (L.) Moench]. To increase the number of evaluated years to the full investigation period, crop rotations were modeled as corn monocultures in the base scenario and grain sorghum monocultures in the adaptation scenario. This conversion affects 120.8 km<sup>2</sup>, accounting for 6.2 % of the modeled watershed. The rationale for this adaptation is the higher water efficiency and water



- stress resilience of sorghum compared to corn found in field experiments (Bhattarai et al., 2020; Jahansouz et al., 2014). In Germany, sorghum was grown on a total area of 11,000 ha in 2020, primarily in drought affected areas and as an energy crop (Bockholt, 2020). Field trials in Northern Bavaria confirmed that yields of sorghum are below to those of corn when sufficient water is available but become comparable under water limited conditions (Bayerische Landesanstalt für Landwirtschaft, 2024).
2. Forest composition adaptation: This adaptation category is based on findings from field experiments with large lysimeters in Germany that show that evapotranspiration from broad leafed trees is notably lower than from coniferous trees (Müller, 2005; Landesamt für Natur, Umwelt und Verbraucherschutz, 2018; Harsch et al., 2009; Müller, 2011). In forested areas which account for 8.8 % of the modeled watershed, the replacement of coniferous by broad-leaved tree species was modeled. Areas currently dominated by spruce were converted to beech-dominated areas and pine-dominated areas are converted to oak-dominated areas.
3. Imperviousness adaptation: The climate adaptation scenario contains a reduction of imperviousness in built-up areas which account for 9.1 % of the modeled catchment area. For urban areas, the impervious fraction was reduced by 13 percentage points to 33 % and for industrial and commercial areas (including large transport infrastructure) the impervious fraction was reduced by 15 percentage points to 43 %. This adaptation was based on findings of previous studies that reductions of sealed surfaces can improve infiltration and that green infrastructure, such as permeable surfaces or vegetated buffers, can mitigate runoff and promote groundwater recharge (Zölch et al., 2017; Sohn et al., 2020).

The detailed changes from the status quo, the “baseline scenario”, to the “adaptation scenario” are shown in .

Table 3 which also defines the short names for the measures based on the initial land use in the baseline scenario and used for further reference and spatially depicted in Fig. 4.

**Table 3: Overview of modeled land use adaptation measures**

| Category          | Land use<br>“Baseline<br>scenario”                   | Land use<br>“Adaptation<br>scenario”                 | Short name   | Share of<br>catchment      |             |                    |
|-------------------|------------------------------------------------------|------------------------------------------------------|--------------|----------------------------|-------------|--------------------|
|                   |                                                      |                                                      |              | Area<br>[km <sup>2</sup> ] | area<br>[%] | HRUs<br>[quantity] |
| Agriculture       | Grain corn                                           | Grain Sorghum                                        | CORN_SORGHUM | 94.6                       | 6.2         | 158                |
| Forest            | Spruce                                               | Beech                                                | SPRUCE_BEECH | 125.6                      | 6.3         | 116                |
|                   | Pine                                                 | Oak                                                  | PINE_OAK     | 48.9                       | 2.5         | 30                 |
| Built-up<br>areas | Settlements<br>(46 %<br>imperviousness)              | Settlements<br>(33 %<br>imperviousness)              | URBAN_IMP    | 143.5                      | 7.2         | 337                |
|                   | Industry and<br>Commerce<br>(58 %<br>imperviousness) | Industry and<br>Commerce<br>(43 %<br>imperviousness) | INDUSTRY_IMP | 38.3                       | 1.9         | 72                 |

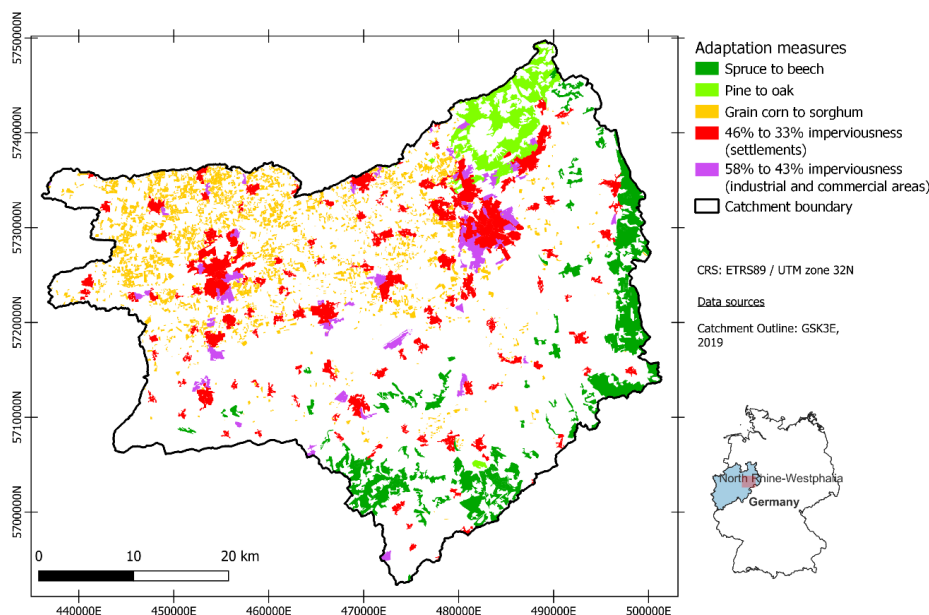

345 **Figure 4: Spatial distribution of modeled adaptation measures**

### 2.3 Assessment of hydrologic impacts

To assess the hydrologic impacts of the land use changes, we analyzed the differences in the water balance components of the adapted HRUs in the study period from 2011 to 2020. The evaluation was carried out at both annual and monthly scales. To account for the different areas of the HRUs, the evaluation metrics for the changed  
 350 land use classes or adaptation categories were spatially aggregated by calculating their respective area-weighted medians.

The examined hydrologic fluxes comprised actual evapotranspiration, surface runoff, tile drainage flow, lateral flow, soil water storage change and groundwater recharge. Reductions in evapotranspiration are considered beneficial to water retention in the landscape. Soil and groundwater storages have comparably longer residence  
 355 times than surface water bodies (Weiler and Miegel, 2016). Tile drainage flow primarily forms a fast flow component (Northcott et al., 2002). Accordingly, increases in lateral flow, soil water change and groundwater recharge are considered to increase water retention whereas increases in surface runoff and tile drainage flow are considered to decrease water retention.

We investigated the annual averages of the fluxes [mm] of the changed HRUs as well as the flux coefficients, normalized by precipitation to aggregate across regions with different precipitation levels as shown in the  
 360 following formula:

$$C_{F,i} = \left( \frac{\bar{F}_i}{P_i} \right) \times 100$$

where  $C_{F,i}$  is the normalized flux coefficient [%] for HRU  $i$ ,  $F_i$  is the annual hydrologic flux [mm] in HRU  $i$  averaged over the investigation period,  $P_i$  is the annual precipitation [mm] received by HRU  $i$  averaged over the  
 365 investigation period, and  $i$  denotes the index of the HRU within the investigated land use class.



The changes in flux coefficients were calculated at the HRU level using the following equation:

$$\Delta C_{F,i} = \left( \frac{\bar{F}_{i,adaptation} - \bar{F}_{i,baseline}}{\bar{P}_i} \right) * 100$$

where  $\Delta C_{F,i}$  is the normalized change of the hydrologic flux coefficient for HRU  $i$  expressed in percentage points [pp],  $F_{i,scenario}$  is the annual hydrologic flux [mm] in HRU  $i$  under the respective scenario averaged over the investigation period,  $P_{HRU i}$  is annual precipitation [mm] received by HRU  $i$  averaged over the investigation period, and  $i$  denotes the index of the HRU within the investigated land use class.

For the analysis of the intra-annual progression of changes to the flux and state variables of the water balance, the changed land use classes were aggregated across the adaptation categories. To quantify the effects of the modeled land use changes on the hydrologic fluxes, differences in monthly values were calculated as follows:

$$\Delta F_{i,m} = \bar{X}_{i,m,adaptation} - \bar{X}_{i,m,baseline}$$

where  $\Delta F_{i,m}$  is the change of a hydrologic flux [mm] in HRU  $i$  in month  $m$ ,  $\bar{X}_{HRU i,m,scenario}$  is the monthly hydrologic flux [mm] in HRU  $i$  averaged over the investigation period under the adaptation and baseline scenarios, and  $i$  denotes the index of the HRU within the investigated adaptation category.

In addition to the water fluxes, the intra-annual progression of the hydrologic state variable soil water content was examined. To analyze the effects of the adaptation measures on soil moisture, the relative plant available water content (RPWC) of the topsoil up to a depth of 300 mm was calculated for each month. The calculation of RPWC is based on the formula derived from UFZ Helmholtz Zentrum für Umweltforschung (2024) and adapted as follows:

$$RPWC_{i,m} = \left( \frac{\overline{SWC}_{i,m} - WP_i}{AWC_i} \right) * 10$$

where  $RPWC_{i,m}$  is the plant available water [%] in HRU  $i$  during month  $m$ ,  $SWC_{i,m}$  is the soil water [mm] stored in HRU  $i$  during month  $m$  averaged over the investigation period,  $WP_i$  is the wilting point of the soil [mm] of HRU  $i$  and  $AWC_i$  is the plant available water capacity of the soil [mm] of HRU  $i$ , and  $i$  denotes the index of the HRU within the investigated adaptation category. For interpretation of this metric, common generalized thresholds are set at 50 % for mild water stress impairing plant development and 30 % for full-fledged water stress with beginning wilting of plants (UFZ Helmholtz Zentrum für Umweltforschung, 2024).

### 3 Results

#### 3.1 Model performance

The implementation of the calibration strategy led to the selection of the parameter set presented in Table 2 which achieved the optimal low-flow performance measured by RSR\_Q70 (0.12) while ranking in the top 1 % (> 0.883) for overall streamflow representation as measured by KGE' in the calibration period. A comparison of model performance metrics shown in Table 4 between the calibration and validation periods (Table 1) indicates that the calibrated model maintains a robust performance outside the calibration period for which the optimal parameter set was selected.



400 **Table 4: Model performance in the calibration, validation, and investigation period (2011 – 2020) at the catchment outlet Kessler 3 and further gauges for spatial validation**

| Period        | Gauge       | River    | KGE <sup>*</sup> | PBIAS | NSE  | RSR  | RSR_Q70 |
|---------------|-------------|----------|------------------|-------|------|------|---------|
| Calibration   | Kessler 3   | Lippe    | 0.89             | -1.8  | 0.78 | 0.46 | 0.12    |
| Validation    | Kessler 3   | Lippe    | 0.90             | 2.9   | 0.80 | 0.45 | 0.26    |
| Investigation | Kessler 3   | Lippe    | 0.90             | -3.4  | 0.83 | 0.41 | 0.14    |
|               | Bentfeld    | Lippe    | 0.74             | 23.5  | 0.75 | 0.50 | 0.43    |
|               | Cappel      | Glenne   | 0.62             | -0.9  | 0.70 | 0.55 | 0.51    |
|               | Overhagen 2 | Gieseler | 0.79             | -10.3 | 0.76 | 0.48 | 0.36    |

In the investigation period from 2011 to 2020, the calibrated model exhibits a KGE of 0.90, PBIAS of -3.4 and an NSE of 0.83 at the main catchment outlet Kessler 3 (Table 4). The flow duration curve (Fig. 6) shows a good agreement of modeled and measured streamflow in all flow segments. The model performs best in the representation of the mid (20 % to 70 % exceedance probability) and very low flows (> 95 % exceedance probability) while the representation of very high flows (< 5 % exceedance probability) is comparatively weaker. Accordingly, the hydrograph (Fig. 5) shows a very good overall representation of discharge dynamics in the recession and low flow periods. The dynamics of extreme peak flows are represented correctly but their magnitude is overestimated by the model. The performance metrics of the gauges of the subcatchment used for spatially distributed validation indicate an overall good representation of streamflow dynamics (Table 4). While being within an acceptable range, they also indicate an overestimation of the headwater's contribution (gauge Bentfeld) to the total discharge which is compensated by higher discharge quantities in the lower catchment when calibrating for the optimal performance for the whole catchment.

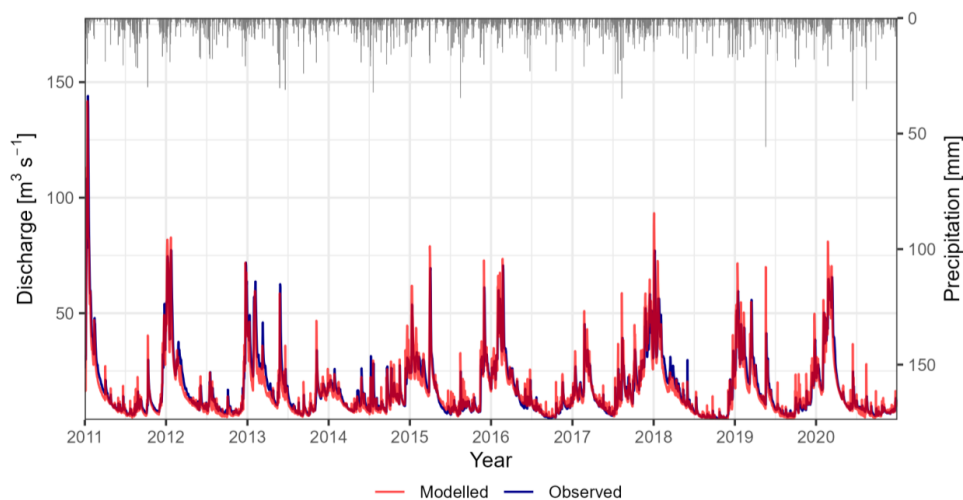

415 **Figure 5: Comparison of the modeled and measured hydrographs at the catchment outlet (gauge Kessler 3) in the investigation period 2011 – 2020 after model calibration**

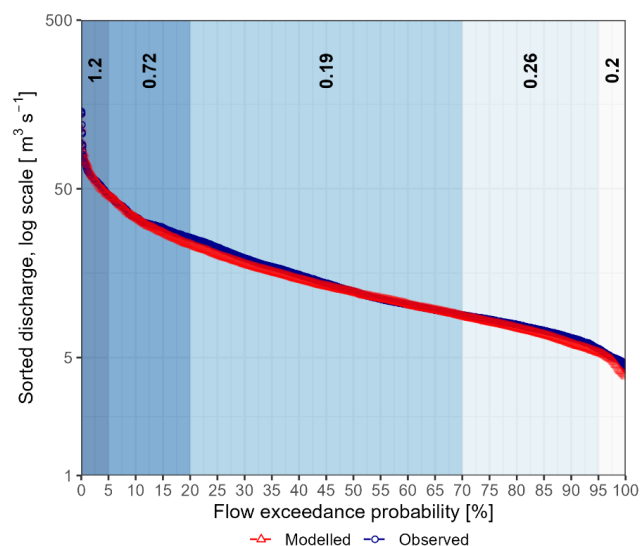

420 **Figure 6:** Comparison of the modeled and measured flow duration curves at the catchment outlet (gauge Kessler 3) in the investigation period 2011 – 2020 after model calibration with RSR of the segments of the flow duration curve, segmentation in accordance with Pfannerstill et al. (2014).

### 3.2 Effects of land use adaptations on hydrologic fluxes and state variables

#### 3.2.1 Changes to the annual water balance

425 We compared the modeled water balances from 2011 to 2020 of the areas which were changed between the baseline and the adaptation land use scenarios. The coefficients of evapotranspiration, direct runoff components and groundwater recharge relative to precipitation for each changed land use class which are used for the analysis and intercomparison of the effects of the land use changes are shown in Table 5 while Fig. 7 contains the underlying flux volumes.

430 Agricultural areas where corn is grown in the baseline scenario receive the least amount of precipitation per year (663 mm) compared to the investigated forested and urban areas and precipitation exhibits the least variance but evapotranspiration is much higher than in all other investigated land use classes. Most of the remaining water infiltrates the soil profile while surface runoff from these areas is minimal. Most of the infiltrated water percolates and recharges the groundwater storage whilst a lesser amount flows laterally through the soil profile or through  
435 drainages. The agricultural areas with corn cropping experienced the largest soil water storage losses throughout the investigation period compared to the other investigated land use classes. When the crop cultivated in these areas is replaced by sorghum (CORN\_SORGHUM), the model results show a decrease in evapotranspiration by an area-weighted median of -11.7 pp which makes more water available for other fluxes. Here, the groundwater recharge experiences the greatest increase of +4.8 pp from crop adaptation while the lateral flow increases by +2.5 pp. Drainage becomes a notably more important flow path with an increase of +3.3 pp while surface runoff remains unchanged.

In the investigated forested areas, evapotranspiration is the dominant water flux but not as pronounced as in the investigated agricultural areas. Forest areas also receive the highest volumes of precipitation. Pine-dominated areas show a higher amount of evapotranspiration compared to spruce-dominated areas. In pine-dominated areas,  
445 groundwater recharge plays a higher role than lateral flow but the latter exhibits a higher spatial variability. No





surface runoff is generated from pine-dominated areas. Spruce-dominated forested areas in turn exhibit larger volumes of horizontal fluxes – through the soil profile as lateral flow as well as surface runoff – while still generating a fair amount of groundwater recharge. Both classes of forested areas show negative changes of soil water content during the investigated dry period but the losses are more pronounced in the pine dominated areas.

450 The replacement of coniferous with broad-leaved tree species causes evapotranspiration to strongly decrease in the changed areas. In areas where spruce trees are replaced by beech trees (SPRUCE\_BEECH) evapotranspiration decreases by -15.7 pp while lateral flow increases most strongly (+9.9 pp) followed by groundwater recharge (+2.4 pp) and surface runoff (+1.6 pp). In areas where pine is replaced by oak (PINE\_OAK) the reduction in evapotranspiration by -17.2 pp increases groundwater recharge most strongly (+10.7). Lateral flow increases by

455 +5.2 pp while surface runoff remains irrelevant in PINE\_OAK areas. All investigated forested areas experience a reduction of average annual soil water depletion. Surface runoff, lateral flow and groundwater recharge show greater variance after adaptation.

The investigated built-up areas receive slightly more precipitation than the investigated agricultural areas but a lot less than the investigated forested areas. Evapotranspiration accounts for more than half of the received

460 precipitation. Most of the remaining water leaves the areas as surface runoff while a smaller fraction recharges the groundwater storage. Lateral flows are minimal. The built-up areas experience relatively small decreases in soil water storage. The reduction in imperviousness leads to reductions in surface runoff by -4.1 pp from the industrial and commercial areas (INDUSTRY\_IMP) and -3.6 pp from the urban areas (URBAN\_IMP). In turn, evapotranspiration increases by +2.6 pp from INDUSTRY\_IMP areas and +1.9 pp from URBAN\_IMP areas.

465 Groundwater recharge rises by +0.5 pp in INDUSTRY\_IMP areas and +0.2 pp in URBAN\_IMP areas. Soil water storage is slightly decreased +0.2 pp in INDUSTRY\_IMP areas and +0.1 pp in URBAN\_IMP areas. Lateral flows and the variance of the water fluxes are only minimally affected by the modeled reduction of imperviousness.

The maps shown in Fig. 8 depict the spatial distribution of the described changes with surface runoff, drainage flow and lateral flow summed to water yield. The maps highlight that changes do not only differ between the

470 adapted land use categories but also within the same category. These differences are related to spatial variance in meteorological variables, soil properties and slopes.

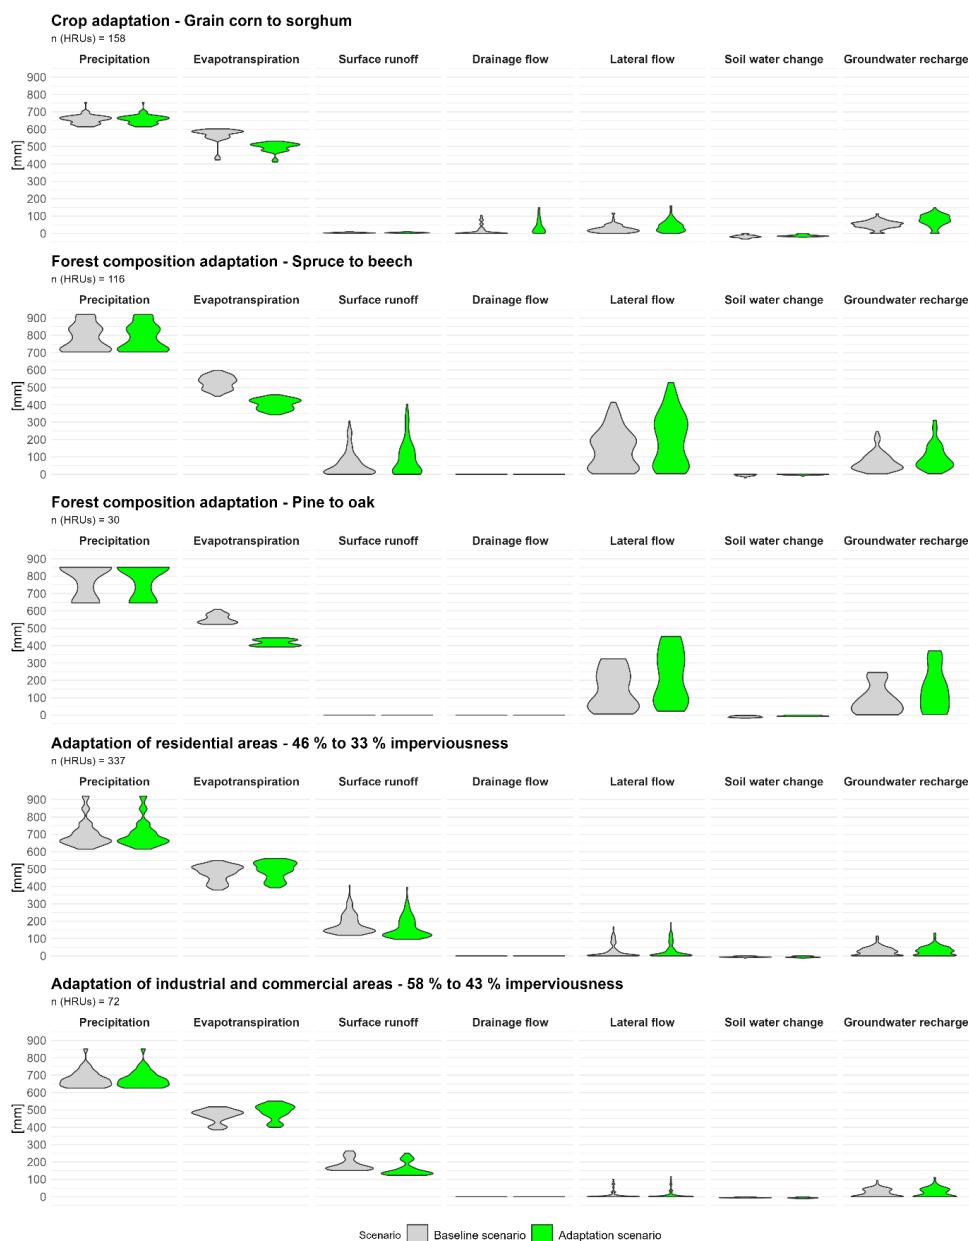

**Figure 7: Average annual water balance components from 2011 to 2020 of adapted areas for baseline and adaptation scenarios, area-weighted**



**Table 5: Precipitation and water flux coefficients in the base and adaptation scenarios, area-weighted medians**

|                                   | Scenario | Unit | CORN_SORGHUM | SPRUCE_BEECH | PINE_OAK    | URBAN_IMP   | INDUSTRY_IMP |
|-----------------------------------|----------|------|--------------|--------------|-------------|-------------|--------------|
| Precipitation                     | all      | mm   | 663          | 767          | 851         | 676         | 679          |
| Evapotranspiration/ Precipitation | baseline | %    | 89.0         | 67.4         | 68.1        | 72.1        | 68.7         |
|                                   | adapted  | pp   | -11.7        | -15.7        | -17.2       | +1.9        | +2.6         |
| Surface runoff/ Precipitation     | baseline | %    | 0.5          | 2.7          | 0.0         | 22.9        | 26.7         |
|                                   | adapted  | pp   | 0.0          | +1.6         | 0.0         | -3.6        | -4.1         |
| Drainage flow/ Precipitation      | baseline | %    | 0.0          | not drained  | not drained | not drained | not drained  |
|                                   | adapted  | pp   | +3.3         |              |             |             |              |
| Lateral flow/ Precipitation       | baseline | %    | 3.6          | 24.2         | 9.7         | 0.4         | 0.2          |
|                                   | adapted  | pp   | +2.5         | +9.9         | +5.2        | +0.1        | 0.0          |
| GW recharge/ Precipitation        | baseline | %    | 8.9          | 6.5          | 18.8        | 3.5         | 4.4          |
|                                   | adapted  | pp   | +4.8         | +2.4         | +10.7       | +0.5        | +0.2         |
| Soil water change/ Precipitation  | baseline | %    | -2.9         | -0.7         | -1.4        | -0.9        | -0.8         |
|                                   | adapted  | pp   | +0.6         | +0.5         | +0.5        | -0.1        | -0.2         |

CORN\_SORGHUM: Crop adaptation – Grain corn to sorghum

SPRUCE\_BEECH: Forest composition adaptation – Spruce to beech

PINE\_OAK: Forest composition adaptation – Pine to oak

URBAN\_IMP: Adaptation of residential areas – 46 % to 33 % impervious fraction

INDUSTRY\_IMP: Adaptation of industrial and commercial areas – 58 % to 43 % impervious fraction

pp: percentage points

480

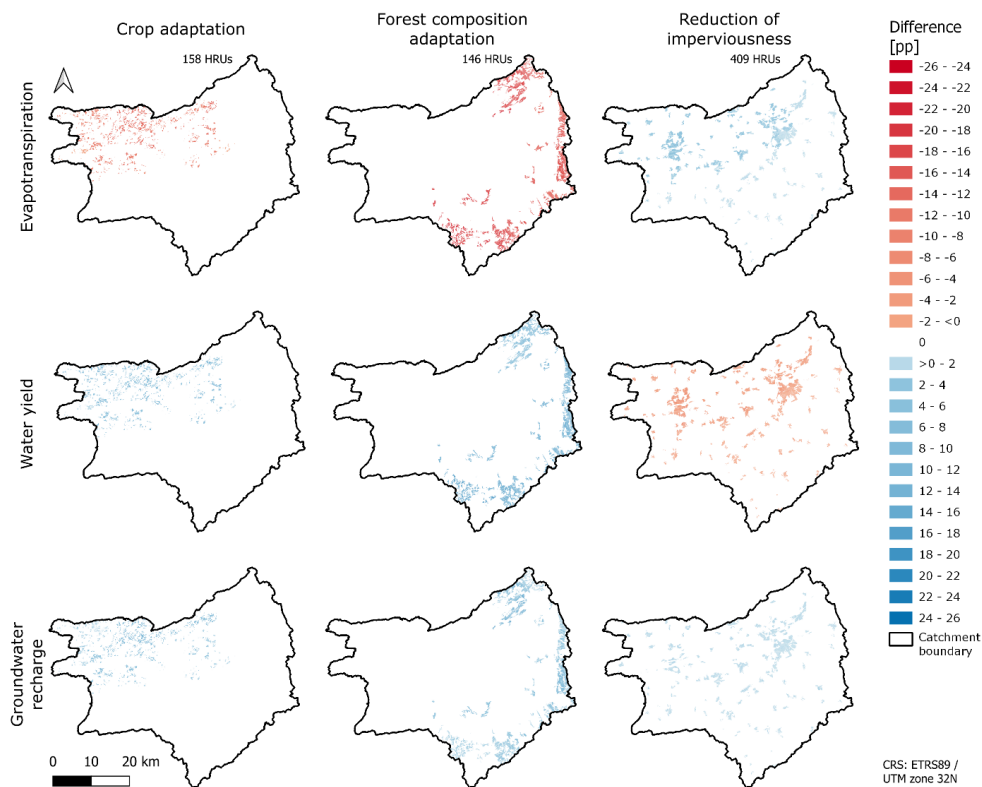

485

**Figure 8: Differences in water flux coefficients between baseline and adaptation scenario by change categories, area-weighted, catchment outline based on GSK3E (LANUV, 2019)**

### 3.2.2 Intra-annual change analysis

490 The analysis of mean monthly differences over the investigation period in water balance components across the  
 changed land use categories – cropland, forests and built-up areas – reveals distinct hydrologic responses. The  
 area-weighted median temperature and precipitation for each month in the respective areas are shown in Fig. 9a  
 for reference. Monthly temperatures and precipitation follow similar seasonal patterns across the investigated land  
 use categories. However, being mostly concentrated in the catchment’s headwaters near the mid-range mountains,  
 495 the adapted forested areas show higher overall volumes of precipitation and lower temperatures throughout the  
 course of the year.

The replacement of grain corn with sorghum leads to evapotranspiration decreases from May to October, with the  
 largest reductions in August and September (Fig. 9b, left plot). Slight increases in evapotranspiration are simulated  
 for the remainder of the year. Further model outputs (not shown) indicate that the reductions during the growing  
 500 season are primarily due to decreased plant transpiration, while the increases outside this period are attributed to  
 higher soil evaporation. Groundwater recharge increases consistently throughout the year, showing an inverse  
 relationship with temperature. Drainage flows increase during the winter months (December to March). As Fig. 9c



(left plot) illustrates, the relative plant available water content in the topsoil of the investigated agricultural areas reaches nearly 100% during the winter months when temperatures are low. It depletes during the warmer months (April to September), dropping below 50% and even below 30 % in May, July and August indicating water stressed conditions. The substitution of grain corn with grain sorghum leads to higher levels of plant available water during the vegetation period from June to October while no notable differences are modeled from November to April, when the fields remain bare. In April, the modeled plant available water is slightly lower with sorghum than with corn cultivation, reflecting the later planting of sorghum in May and the resulting longer exposure of bare soil.

The investigated forest composition adaptations reduce evapotranspiration from September to May, with the most pronounced effects in early autumn (September and October) and spring (March and April) as shown in Fig. 9b (middle plot). From June to August, evapotranspiration increases slightly, reflecting the higher water demand of broad-leaved trees during this period. Lateral flow increases throughout the year, with the largest change values occurring in winter and spring. Groundwater recharge also rises year-round, peaking in spring and late autumn. Surface runoff increases slightly in the period from December to April when the broad-leaved trees are dormant.

In winter, when temperatures are low, the relative plant available water content of the topsoil under coniferous trees reaches 100 % (Fig. 9c, left plot). It follows an annual cycle with critically low levels – below 50 % and even 30 % – occurring during the warmer months (April to September). Through forest composition adaptation towards broad-leaved trees, plant available water increases significantly from April, May and September, reducing the duration of critically low levels by three months. However, the plant-available water still reaches levels indicating water stress from June to August when evapotranspiration is even higher after adaptation.

During the period from October to March only small or no variations in soil moisture content occur.

In built-up areas, changes to water balance components exhibit lower intra-annual variability than in adapted agricultural and forested areas as shown in Fig. 9b (right plot). Reducing impervious surfaces increases evapotranspiration primarily in the warm months from June to October, with the most pronounced increases in July and August. Groundwater recharge remains unchanged from August to November while increases are relatively consistently distributed throughout the rest of the year. Meanwhile, surface runoff decreases year-round, with the greatest reductions occurring in summer. The plant available water in the topsoil follows the seasonal temperature cycle (Fig. 9c, left plot). The reductions of imperviousness lead to slight increases from May to October.

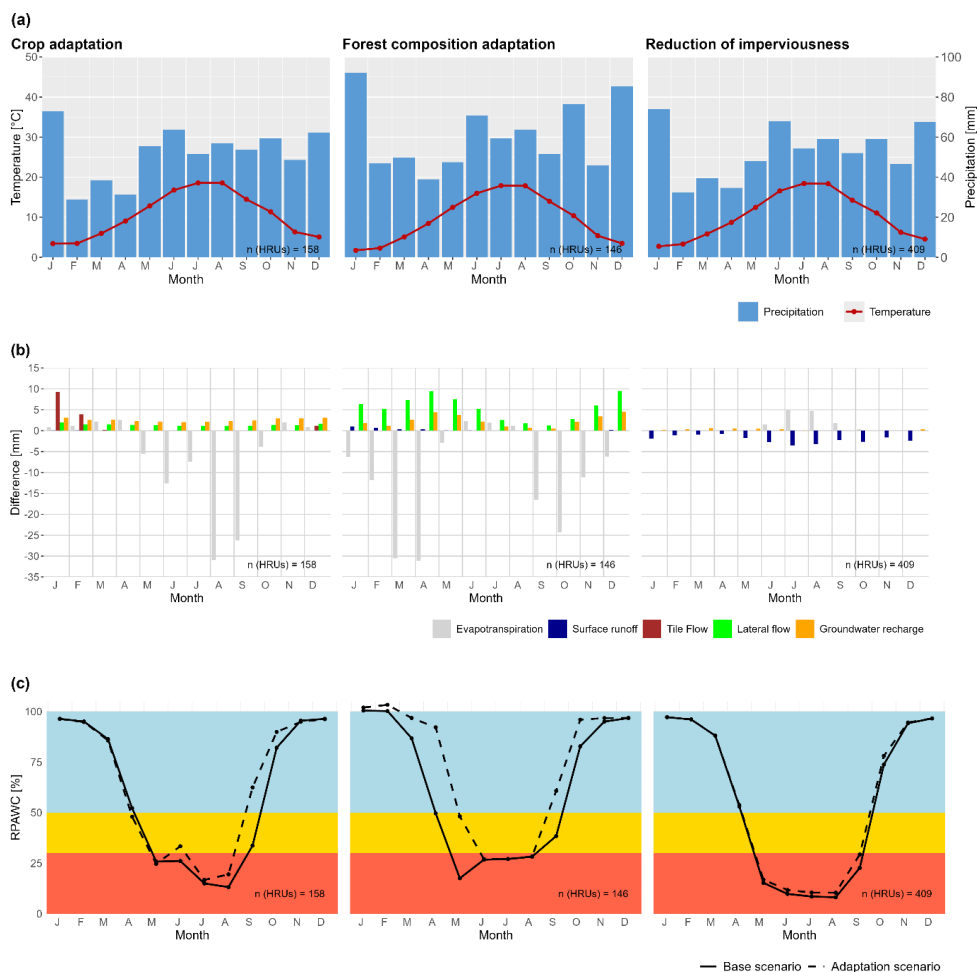

535 **Figure 9: Monthly scenario comparison of mean monthly climate (a), changes of water balance components (b) and**  
**relative plant available water content (RPAWC) of the topsoil (300mm) with thresholds of 50% for moderate and 30%**  
**for extreme water stress (c) over the investigation period. All data are area-weighted medians of the changed areas.**

## 4 Discussion

### 4.1 Model performance

540 The model represents discharge dynamics at the catchment outlet very well in the recession and low flow periods.  
 The model fit of extreme peak flows shows good timing but an overestimation of their magnitude. This is coherent  
 with the applied calibration strategy which was deliberately chosen with a focus on the study of droughts and water  
 retention. It shows that trade-offs occur in the representation of high and low flow by the model. Moreover, the  
 overestimation of discharge peaks by the model can plausibly be related to the flood control reservoirs in the upper  
 545 catchment. They reduce the highest discharge peaks which would naturally occur with increased magnitude but  
 these anthropogenic streamflow alterations are not considered in the model.



The performance metrics at the gauges used for additional spatial validation indicate an overall good representation of streamflow dynamics (Table 4) with PBIAS and NSE values in the range for satisfactory model performance in accordance with the guidelines published by Moriasi et al. (2007). The PBIAS metric also indicates an overestimation of the contribution of the headwaters in mountainous areas (gauge Bentfeld) to the total discharge. These are compensated in the model by underestimated discharges in the lowland catchment when calibrating for the optimal performance for the whole catchment. Therefore, the representation of the water balance of the whole catchment is reasonable while differences in its exact spatial distribution are modeled less accurately, although within reasonable limits.

#### 4.2 Land use adaptation

The implemented land use adaptations have important hydrologic implications represented by the changes in water fluxes and storage states in the respective areas. The responses are overall consistent with previous studies showing that land management strategies, such as changes in agricultural crops (Placatová et al., 2024; Alves Rodrigues Pinheiro and Nunes, 2023) or forest composition (Bosch and Hewlett, 1982; Cao et al., 2016) have notable impacts on the water balance.

The predicted reduction of evapotranspiration due to crop adaptation (Fig. 7) shows that the reduced water demand of sorghum over corn (Howell et al., 2012) is confirmed by the hydrological model under the study-specific meteorological and site conditions. The underlying difference in model parameters is the reduction in maximum leaf area index (LAI) which is the basis for the calculation of plant transpiration (Neitsch et al., 2011) from 6 for corn to 3 for sorghum (SWAT+ plant database, Bieger et al., 2017). The temporal distribution of the reduction in evapotranspiration, which is concentrated in the warmest months when the climatic water balance is lowest, makes this adaptation measure particularly suitable for stabilizing water fluxes throughout the year. The reduction of evapotranspiration increases water availability for surface runoff and underground water fluxes. Groundwater recharge exhibits the largest increase, followed by lateral flow. Increases of these underground fluxes through storages with relatively long retention times contribute to increased water retention in the landscape. While surface runoff remains unchanged, the highly reactive drainage flow is increased in winter. This is detrimental to increased water retention and it should be further studied whether drainage flow could be reduced by combining the crop adaptations with adaptive drainage management as an additional best management practice. Water storage in the soil profile increases in line with the lower water demand of sorghum compared to corn. The increased soil water also plausibly explains the modeled increases in evaporation from the soil outside of the growing period. The increased plant available water in the topsoil during the vegetation period (Fig. 9c, left plot) underlines the potential of this adaptation measure to reduce water stress in hot and dry summers. While the model results for crop adaptation show that water retention increases, field trials have shown that sorghum cultivation may however not be able to produce comparable amounts of biomass when corn does not experience water stress (Bayerische Landesanstalt für Landwirtschaft, 2024). However, in dry conditions the goals of water management and agricultural productivity are more aligned when drought resilience and thermal requirements of the sorghum coincide (Chadalavada et al., 2021) with their potential for increasing water retention in the catchment. Advances towards adapting sorghum to cooler climates (Schaffasz et al., 2019) can further increase these synergies. Moreover, hydrological considerations and water policies may further incentivize crop adaptation towards increased water efficiency even at the expense of productivity.



To accurately represent forested areas in the model, plant parameters specially adapted to Germany (Müller, 2022) have been applied for the relevant tree species instead of the SWAT+ default database. The replacement of coniferous with broad leafed trees leads to strong reductions of modeled evapotranspiration (Fig. 7) which is consistent with the findings of field experiments with large lysimeters in Germany (Müller, 2005; Landesamt für Natur, Umwelt und Verbraucherschutz, 2018; Harsch et al., 2009; Müller, 2011). The intra-annual distribution (Fig. 9b, middle plot) of the changes is based on the different phenology of the tree species leading to transpiration of broad-leafed trees peaking in summer where changes are minimal and even negative. In the model, this is represented by differences in LAI values, which are higher for broad-leaved trees (beech: 6.7, oak: 5.2) than for coniferous trees (spruce: 6.0, pine: 3.5) outside the dormancy period. During dormancy, LAI values drop significantly for broad-leaved species (oak and beech: 0.01), while coniferous trees retain their foliage (spruce: 5.0, pine: 2.9).

The reduced evapotranspiration allows more water to move vertically in the soil profile as lateral flow or percolate into the groundwater storage. PINE\_OAK areas exhibit the largest increase in groundwater recharge, while SPRUCE\_BEECH areas show the greatest increase in lateral flow. This contrast is linked to differences in topography, with PINE\_OAK areas located in flatter terrain and SPRUCE\_BEECH areas in more hilly regions. Similar to the adaptation measures in agricultural areas, these changes in water fluxes increase the retention in the landscape that can contribute to maintaining channel discharge and water levels during dry periods. In SPRUCE\_BEECH areas, the surface runoff also increases (Fig. 7) and the intra-annual analysis (Fig. 9b, middle plot) indicates that these changes are concentrated in the leafless months and are therefore plausibly related to the lack of canopy interception in this time period which is also modeled based on LAI (Neitsch et al., 2011). While being surpassed by the increases in lateral flow and groundwater recharge, the increases in surface runoff are detrimental to water retention but could potentially be mitigated by additional water retention measures in the forests (Wilbrand, 2025; Valtera and Schaetzl, 2017; Schüler, 2006). In forested areas, the adaptation measures led to higher soil moisture in the investigation period (Fig. 7). The modelled reduction in soil water content under dry conditions as well as the impacts of the forest composition adaptation are consistent with other studies that use in-situ measurements for validation (Vorobevskii et al., 2024; Boeing et al., 2022).

Driven by the changes in evapotranspiration, the plant available water in the soil is increased in both spring and fall leading to a shortening of the water stressed period (Fig. 9c, middle plot). Spruce trees have been deliberately planted in the *Egge* mountains for economic purposes since 1803 at the cost of the afforestation with native oak and beech trees (Kreis Paderborn, 2024). Especially since 2018, the spruce plantations have been subject to increasing degradation caused by dry periods and bark beetle infestation (Kreis Paderborn, 2024) with damaged areas amounting up to 30 km<sup>2</sup> in the state-owned forests (Förderverein Nationalpark Senne-Eggegebirge e.V., 2023). Similar trends have been observed in other regions of Germany (Sutmöller and Meesenburg, 2018) with pronounced impacts on hydrology as shown by Wagner et al. (2025). With soil moisture droughts predicted to become more likely in Europe under climate change (Grillakis, 2019; Boeing et al., 2022; Samaniego et al., 2018), this process will be exacerbated. But the subsequent environmental management options cover a wide range from targeted reforestation to rewilding approaches in specially protected areas such as the core zones of the mountainous German national parks *Bayerischer Wald* (Müller, 2022) and *Harz* (Harzer Tourismusverband e.V.; Nationalparkverwaltung Harz). This study's results can serve as guidelines for these choices from a hydrologic perspective.





For built-up areas, instead of investigating the widely studied impacts of spatial extent changes, this study focused on the change of impervious fraction of the surfaces which is also known to affect the water balance (Wang et al., 2021). Imperviousness is a SWAT+ model parameter which was adjusted to realistic average values for the study area based on the described remote sensing study of the European Environment Agency (2020b) while the unsealed surface fraction of built-up areas is represented by a plant class for urban green areas with fescue parameters (SWAT+ plant database, Bieger et al., 2017). While not accounting for the small-scale variability of urban spaces, this parameterization allows to model the water balance of built-up areas with similar accuracy than the other investigated land use categories. The periods of modeled soil water scarcity in built-up areas (Fig.9c, right plot) in the summer months should not be interpreted as plants experiencing water stress. In the model, sealed areas and unsealed green areas are lumped together in the same HRUs and therefore no spatial distinction of the soil water that is available to plants is possible.

The modeled decline in surface runoff from built-up areas as well as the increases in groundwater recharge and – to a lesser extent – soil water content under the adaptation scenario confirm the effectiveness of the measures aimed at enhancing infiltration. These results align with previous hydrological studies on the water balance effects of urbanization (Booth and Jackson, 1997). The changes from fast to slow hydrologic fluxes increase the water retention in built-up areas. The modeled increases in evapotranspiration can furthermore provide local cooling effects by promoting latent heat transfers that are important for heat adaptive city planning (Wong et al., 2021).

## 5 Conclusions

In this study, the eco-hydrological model SWAT+ was applied to investigate the hydrologic impacts of land use-based climate adaptation measures in agricultural, forested and built-up areas during an exceptionally dry period. The ability of the plant model in SWAT+ to accurately represent the impacts of different plant species on the water balance was crucial for conducting this study, which focused on changes within land use classes rather than on their proportional shares in the catchment. A realistic spatial discretization of land use distribution and parameterization was achieved using a combination of external data sources, including agricultural databases, remote sensing products, and prior studies on drainage potential and forest characteristics. This foundation enabled an in-depth assessment of the hydrologic impacts of land use changes under abnormally dry conditions. The calibration strategy which focused on the representation of low-flow periods while maintaining a good overall representation of streamflow dynamics can serve as a blueprint for similar model applications.

Overall, the model results are plausible and consistent with field studies on smaller scales. They indicate that land use strategies promoting infiltration and reducing surface runoff can enhance water retention in the landscape thereby contributing to drought resilience. Furthermore, the modeled land use changes in forested and agricultural areas can contribute to reducing evapotranspiration and strengthening water fluxes through storages with longer retention times. The reduced water demand of the plants in the adapted scenario leads to increases in soil moisture content, thereby decreasing water stress. In built-up areas, the reduction of the impervious fraction increases water retention by strengthening infiltration but also increases evapotranspiration. The latter effect, while not increasing water retention, can improve heat resilience in settlement areas by increasing evapotranspiration as well as water retention by increasing groundwater recharge. These findings emphasize the importance of adaptive land use planning and land management that consider land cover-specific responses to adapt to climatic extremes. Understanding how land use adaptations interact with hydrologic processes can inform sustainable water



665 management strategies, ensuring balanced water distribution in time and space as well as mitigating potential  
negative impacts of changing climatic conditions. With the current measures being limited at scale by adjusting  
only the land cover within the same land use class, further investigations should focus additionally on land use  
transitions and investigate the implications of combined measures on catchment water balance and streamflow  
dynamics.

670 These results underscore the significant impact of land use adaptations on hydrologic processes, highlighting the  
potential for management strategies to influence water availability, runoff dynamics, and groundwater recharge  
across different land cover types. As such they are important nature-based solutions to climate adaptation which  
need to be recognized by policy makers and administrations alike to establish regulatory and financial frameworks  
that are conducive to their implementation.

675



## Appendices

### APPENDIX 1: Land use parameterization with the IACS database

680 For each agricultural field, the temporally dominant crop was identified by the most frequently planted crop on  
the field over the seven-year period. If two crops met this condition, the most recent was selected as the dominant  
crop. The SWAT+ models' agricultural land use classes from the plant parameter database of SWAT+ were then  
assigned based on the IACS data in a stepwise approach shown in Fig. A1. All agricultural areas for which crops  
were specified based on the IACS data were superimposed onto agricultural areas in the CORINE 2018 land use  
base layer. Remaining agricultural areas in the CORINE 2018 layer that could not be further specified by IACS  
685 predominantly contain rural roads and pathways, shrub areas, small forests and other landscape elements (6.96 %  
of the catchment area) and were lumped into the range brushland class.

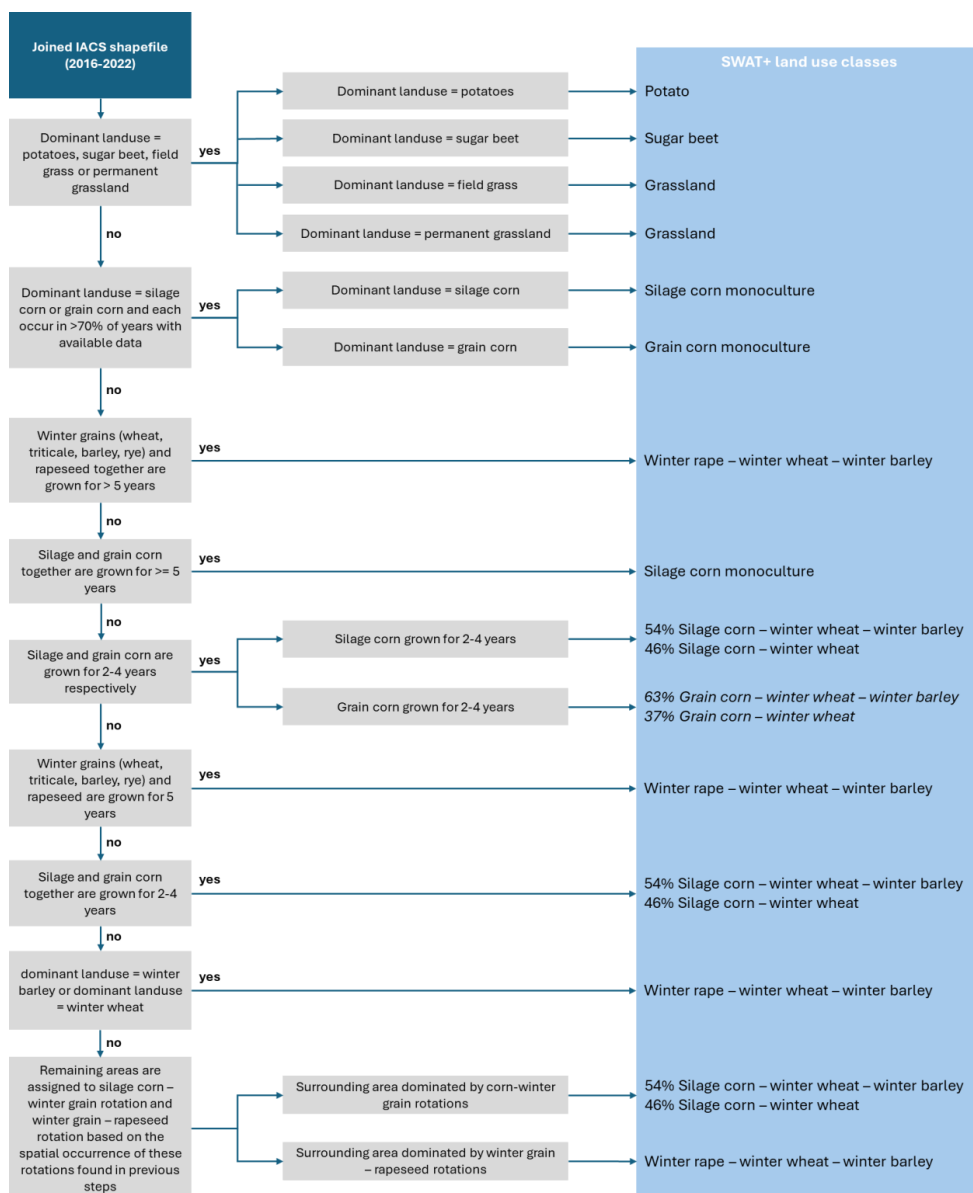

690 **Figure A1: Workflow of the transfer of agricultural land uses derived from the field data of the Integrated Administration and Control System (IACS) data to land use classes for the SWAT+ model**



## APPENDIX 2: Parameterization of agricultural management operations

695 **Table A1: Tillage operations partially adjusted for the upper Lippe catchment SWAT+ model**

| Name                    | Use                                                             | Mixing efficiency<br>[fraction] | Mixing depth<br>[mm] | Roughness [mm] |
|-------------------------|-----------------------------------------------------------------|---------------------------------|----------------------|----------------|
| Plowing                 | All plowing operations                                          | 0.95                            | 270                  | 75             |
| Harrowing               | All seedbed preparation operations                              | 0.25                            | 60                   | 20             |
| Cultivating             | All deep stubble cultivation operations                         | 0.4                             | 160                  | 20             |
| Roller harrow (default) | Shallow stubble cultivation operations on all crops except corn | 0.4                             | 60                   | 5              |
| TripleK (default)       | Shallow stubble cultivation operations after corn               | 0.4                             | 100                  | 25             |

**Table A2: Parameterization of harvest operations adjusted for the upper Lippe catchment SWAT+ model**

| Operation        | Application                 | Harvest Type | Harvest index<br>[fraction] | Harvest efficiency<br>[fraction] |
|------------------|-----------------------------|--------------|-----------------------------|----------------------------------|
| Grain harvest    | Winter wheat, winter barley | grain        | 0.7                         | 0.95                             |
| Rape harvest     | Rape                        | biomass      | 0.25                        | 0.95                             |
| Silage (default) | Silage maize                | biomass      | 0.9                         | 0.95                             |
| Hay cut 1        | Winter pasture first cut    | biomass      | 0.7                         | 1                                |
| Hay cut 2        | Winter pasture second cut   | biomass      | 0.65                        | 1                                |
| Hay cut 3        | Winter pasture third cut    | biomass      | 0.6                         | 1                                |
| Hay cut 4        | Winter pasture fourth cut   | biomass      | 0.55                        | 1                                |

700 Note: In SWAT+, the *harvest type* defines whether seed or total above ground biomass are harvested while *harvest index* specifies the fraction of the harvested biomass and *harvest efficiency* the fraction of yield biomass removed by the harvesting equipment, with the remaining yield lost (Neitsch et al., 2011). The *mixing efficiency* specifies the fraction of materials (residue, nutrients, and pesticides) on the soil surface that are mixed uniformly throughout the soil depth specified by *mixing depth* and the *roughness* specifies the depth of the surface roughness remaining after the tillage operation (Neitsch et al., 2011).

705



**Table A3a: Agricultural management operations specified for the upper Lippe catchment, multiyear**

|        | Cereals/Oilseed |               | Grain Corn/Cereals* |                 | Silage Corn/Cereals* |                 | Sorghum/Cereals* |                 |
|--------|-----------------|---------------|---------------------|-----------------|----------------------|-----------------|------------------|-----------------|
|        | Date            | Operation     | Date                | Operation       | Date                 | Operation       | Date             | Operation       |
| Year 1 | Jul. 25         | Harvest:      | Apr. 3              | Plow            | Apr. 3               | Plow            | May 10           | Plow            |
|        |                 | <b>Rape</b>   |                     |                 |                      |                 |                  |                 |
|        | Aug. 9          | Rollharrow    | Apr. 7              | Harrow          | Apr. 7               | Harrow          | May 14           | Harrow          |
|        | Aug. 23         | Cultivate     | Apr. 24             | Plant:          | Apr. 24              | Plant:          | May 10           | Plant:          |
|        |                 |               |                     | <b>Corn</b>     |                      | <b>Silage</b>   |                  | <b>Sorghum</b>  |
|        |                 |               |                     |                 |                      | <b>Corn</b>     |                  |                 |
|        | Oct. 16         | Harrow        | Oct. 16             | Harvest:        | Sep. 23              | Harvest:        | Oct. 19          | Harvest:        |
|        |                 |               |                     | <b>Corn</b>     |                      | <b>Silage</b>   |                  | <b>Sorghum</b>  |
|        |                 |               |                     |                 |                      | <b>Corn</b>     |                  |                 |
|        | Oct. 18         | Plant:        | Oct. 18             | TripleK         | Oct. 18              | TripleK         | Oct. 21          | TripleK         |
|        |                 | <b>Wheat</b>  |                     |                 |                      |                 |                  |                 |
|        |                 |               | Oct. 20             | Plow            | Oct. 20              | Plow            | Oct. 22          | Plow            |
|        |                 |               | Oct. 22             | Rollharrow      | Oct. 22              | Rollharrow      | Oct. 23          | Rollharrow      |
|        |                 |               | Oct. 25             | Plant:          | Oct. 25              | Plant:          | Oct. 25          | Plant:          |
|        |                 |               |                     | <b>Wheat</b>    |                      | <b>Wheat</b>    |                  | <b>Wheat</b>    |
| Year 2 | Aug. 9          | Harvest:      | Aug. 9              | Harvest:        | Aug. 9               | Harvest:        | Aug. 9           | Harvest:        |
|        |                 | <b>Wheat</b>  |                     | <b>Wheat</b>    |                      | <b>Wheat</b>    |                  | <b>Wheat</b>    |
|        | Aug. 11         | Rollharrow    | Aug. 11             | Rollharrow      | Aug. 11              | Rollharrow      | Aug. 11          | Rollharrow      |
|        | Aug. 25         | Cultivate     | Sep. 5              | Cultivate       | Sep. 5               | Cultivate       | Sep. 5           | Cultivate       |
|        | Sep. 9          | Plow          | Sep. 9              | Plow            | Sep. 9               | Plow            | Sep. 9           | Plow            |
|        | Sep. 9          | Harrow        | Sep. 22             | Rollharrow      | Sep. 22              | Rollharrow      | Sep. 22          | Rollharrow      |
|        | Sep. 23         | Plant:        | Sep. 23             | Plant:          | Sep. 23              | Plant:          | Sep. 23          | Plant:          |
|        |                 | <b>Barley</b> |                     | <b>Barley</b>   |                      | <b>Barley</b>   |                  | <b>Barley</b>   |
| Year 3 | Jul. 14         | Harvest:      | Jul. 14             | Harvest:        | Jul. 14              | Harvest:        | Jul. 14          | Harvest:        |
|        |                 | <b>Barley</b> |                     | <b>Barley</b>   |                      | <b>Barley</b>   |                  | <b>Barley</b>   |
|        | Jul. 16         | Rollharrow    | Jul. 16             | Rollharrow      | Jul. 16              | Rollharrow      | Jul. 16          | Rollharrow      |
|        | Aug. 20         | Plow          | Jul. 23             | Plow            | Jul. 23              | Plow            | Jul. 23          | Plow            |
|        | Aug. 26         | Harrow        | Jul. 25             | Plant:          | Jul. 25              | Plant:          | Jul. 25          | Plant:          |
|        |                 |               |                     | <b>Clover**</b> |                      | <b>Clover**</b> |                  | <b>Clover**</b> |
|        | Aug. 27         | Plant:        |                     |                 |                      |                 |                  |                 |
|        |                 | <b>Rape</b>   |                     |                 |                      |                 |                  |                 |

\* also incorporated as 2-year rotations and single-year monocultures limited to Year 1

\*\* red clover as cover crop, only in multi-year crop rotations



710 **Table A3b: Agricultural management operations specified for the upper Lippe catchment, single year**

|        |         | Winter Pasture |            | Sugar beet |            |
|--------|---------|----------------|------------|------------|------------|
|        |         | Date           | Operation  | Date       | Operation  |
| Year 1 | May 5   | Harvest:       |            | Mar. 9     | Harrow     |
|        |         |                | <b>Hay</b> |            |            |
|        | Jun. 6  | Harvest:       |            | Apr. 8     | Plant:     |
|        |         |                | <b>Hay</b> |            | Sugar beet |
|        | Jul. 23 | Harvest:       |            | Oct. 7     | Harvest:   |
|        |         |                | <b>Hay</b> |            | Sugar beet |
|        | Sep. 8  | Harvest:       |            | Oct. 10    | Plow       |
|        |         |                | <b>Hay</b> |            |            |

#### Author contributions

Conceptualization, and Methodology: SG, PW, JK, NF

Funding acquisition: PW, NF

Investigation, Data curation, Formal analysis, and Visualization: SG

715 Supervision, and Validation: PW, JK, NF

Writing (original draft preparation): SG

Writing (review and editing): all authors

#### Acknowledgements

720 This study was conducted as part of the KliMaWerk research project funded by the German Federal Ministry of Education and Research as part of the "Water Extreme Events" (WaX) research program.

This research was supported in part through high-performance computing resources available at the Kiel University Computing Centre.

The R script for transferring the soil parameters from the 1:50,000 soil map of North-Rhine Westphalia to the SWAT+ soil database format was kindly provided by Mike Fuchs.

#### 725 Competing interests

The authors declare that they have no conflict of interest. PW is a member of the editorial board of HESS.



## References

- Alves Rodrigues Pinheiro, E. and Nunes, M. R.: Long-term agro-hydrological simulations of soil water dynamic  
730 and maize yield in a tillage chronosequence under subtropical climate conditions, *Soil and Tillage Research*,  
229, 105654, doi:10.1016/j.still.2023.105654, 2023.
- Arnold, J. G. and Fohrer, N.: SWAT2000: current capabilities and research opportunities in applied watershed  
modelling, *Hydrological Processes*, 19, 563–572, doi:10.1002/hyp.5611, 2005.
- Arnold, J. G., Srinivasan, R., Muttiah, R. S., and Williams, J. R.: Large area hydrologic modeling and  
735 assessment part I: model development 1, *J American Water Resour Assoc*, 34, 73–89, doi:10.1111/j.1752-  
1688.1998.tb05961.x, 1998.
- Auerswald, K., Geist, J., Quinton, J. N., and Fiener, P.: HESS Opinion: Floods and droughts – Land use, soil  
management, and landscape hydrology are more significant drivers than increasing temperatures, 2024.
- Ault, T. R.: On the essentials of drought in a changing climate, *Science (New York, N.Y.)*, 368, 256–260,  
740 doi:10.1126/science.aaz5492, 2020.
- Bayerische Landesanstalt für Landwirtschaft: Versuchsergebnisse Körnerhirse (*Sorghum bicolor*),  
<https://www.lfl.bayern.de/ipz/mais/295682/index.php>, 2024.
- Beguería, S. and Vicente-Serrano, S. M.: SPEI: Calculation of the Standardized Precipitation-Evapotranspiration  
Index, R-Package, 2023.
- 745 Berihun, M. L., Tsunekawa, A., Haregeweyn, N., Tsubo, M., Fenta, A. A., Ebabu, K., Bayabil, H. K., and Dile,  
Y. T.: Predicting runoff and sediment responses to climate-resilient land use and management scenarios,  
*Environ Sci Pollut Res*, 30, 72262–72283, doi:10.1007/s11356-023-27452-w, 2023.
- Bernini, A., Becker, R., Adeniyi, O. D., Pilla, G., Sadeghi, S. H., and Maerker, M.: Hydrological Implications of  
Recent Droughts (2004–2022): A SWAT-Based Study in an Ancient Lowland Irrigation Area in Lombardy,  
750 Northern Italy, *Sustainability*, 15, 16771, doi:10.3390/su152416771, 2023.
- Bhattarai, B., Singh, S., West, C. P., Ritchie, G. L., and Trostle, C. L.: Water Depletion Pattern and Water Use  
Efficiency of Forage Sorghum, Pearl millet, and Corn Under Water Limiting Condition, *Agricultural Water  
Management*, 238, 106206, doi:10.1016/j.agwat.2020.106206, 2020.
- Bieger, K. and Arnold, J. G.: Introduction to SWAT+, A Completely Restructured Version of the Soil and Water  
755 Assessment Tool, *Journal of the American Water Resources Association*, 53, 115–130, 2017.
- Bieger, K., Arnold, J. G., Rathjens, H., White, M. J., Bosch, D. D., Allen, P. M., Volk, M., and Srinivasan, R.:  
Introduction to SWAT+, A Completely Restructured Version of the Soil and Water Assessment Tool, *J Am  
Water Resour Assoc*, 53, 115–130, doi:10.1111/1752-1688.12482, 2017.
- Blickensdörfer, L., Oehmichen, K., Pflugmacher, D., Kleinschmit, B., and Hostert, P.: Dominant Tree Species  
760 for Germany (2017/2018), Eberswalde, 2022.
- Blickensdörfer, L., Oehmichen, K., Pflugmacher, D., Kleinschmit, B., and Hostert, P.: National tree species  
mapping using Sentinel-1/2 time series and German National Forest Inventory data, *Remote Sensing of  
Environment*, 304, 114069, doi:10.1016/j.rse.2024.114069, 2024.
- Bockholt, K.: Sorghumhirse trotz Dürre: Anbaufläche in Deutschland steigt langsam, *agrarheute.com*,  
765 23/12/2020, [https://www.agrarheute.com/pflanze/mais/sorghumhirse-trotzt-duerre-anbauflaeche-  
deutschland-steigt-langsam-576470#kommentare](https://www.agrarheute.com/pflanze/mais/sorghumhirse-trotzt-duerre-anbauflaeche-deutschland-steigt-langsam-576470#kommentare), last access: 24 April 2025, 2020.



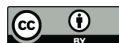

- Boeing, F., Rakovec, O., Kumar, R., Samaniego, L., Schrön, M., Hildebrandt, A., Rebmann, C., Thober, S., Müller, S., Zacharias, S., Bogena, H., Schneider, K., Kiese, R., Attinger, S., and Marx, A.: High-resolution drought simulations and comparison to soil moisture observations in Germany, *Hydrol. Earth Syst. Sci.*, 26, 5137–5161, doi:10.5194/hess-26-5137-2022, 2022.
- 770 Boergens, E., Güntner, A., Dobsław, H., and Dahle, C.: Quantifying the Central European Droughts in 2018 and 2019 With GRACE Follow-On, *Geophysical Research Letters*, 47, doi:10.1029/2020GL087285, 2020.
- Booth, D. B. and Jackson, C. R.: URBANIZATION OF AQUATIC SYSTEMS: DEGRADATION THRESHOLDS, STORMWATER DETECTION, AND THE LIMITS OF MITIGATION 1, *J American*
- 775 *Water Resour Assoc*, 33, 1077–1090, doi:10.1111/j.1752-1688.1997.tb04126.x, 1997.
- Bosch, J. M. and Hewlett, J. D.: A review of catchment experiments to determine the effect of vegetation changes on water yield and evapotranspiration, *Journal of Hydrology*, 55, 3–23, doi:10.1016/0022-1694(82)90117-2, 1982.
- Bundesanstalt für Geowissenschaften und Rohstoffe: *Bodenkundliche Kartieranleitung*, 5., verb. und erw. Aufl., 780 Hannover, 438 pp., 2005.
- Bundesministerium für Umwelt und Naturschutz, nukleare Sicherheit und Verbraucherschutz: *Nationale Wasserstrategie: Kabinettsbeschluss vom 15. März 2023*, 120 pp., 2023.
- Cao, S., Zhang, J., Chen, L., and Zhao, T.: Ecosystem water imbalances created during ecological restoration by afforestation in China, and lessons for other developing countries, *Journal of environmental management*,
- 785 183, 843–849, doi:10.1016/j.jenvman.2016.07.096, 2016.
- Čerkasova, N., White, M., Arnold, J., Bieger, K., Allen, P., Gao, J., Gambone, M., Meki, M., Kiniry, J., and Gassman, P. W.: Field scale SWAT+ modeling of corn and soybean yields for the contiguous United States: National Agroecosystem Model Development, *Agricultural Systems*, 210, 103695, doi:10.1016/j.agry.2023.103695, 2023.
- 790 Chadalavada, K., Kumari, B. D. R., and Kumar, T. S.: Sorghum mitigates climate variability and change on crop yield and quality, *Planta*, 253, 113, doi:10.1007/s00425-021-03631-2, 2021.
- Deutscher Wetterdienst: *Standardized Precipitation Evapotranspiration Index (SPEI): Dokumentation*, [https://www.dwd.de/DE/fachnutzer/landwirtschaft/dokumentationen/agrowetter/spei.pdf?\\_\\_blob=publicationFile&v=2](https://www.dwd.de/DE/fachnutzer/landwirtschaft/dokumentationen/agrowetter/spei.pdf?__blob=publicationFile&v=2), n.d.
- 795 Deutscher Wetterdienst: *Raster data set of daily maximum and minimum temperatures in °C and sums of precipitation in mm for Germany - HYRAS-DE--TASMAX/-TASMIN/PRE, Version v5.0*, [https://opendata.dwd.de/climate\\_environment/CDC/grids\\_germany/daily/hyras\\_de/](https://opendata.dwd.de/climate_environment/CDC/grids_germany/daily/hyras_de/), 2022.
- Deutscher Wetterdienst: *Phenological observations of crops from sowing to harvest (annual reporters, historical): Version v009*,
- 800 [https://opendata.dwd.de/climate\\_environment/CDC/observations\\_germany/phenology/annual\\_reporters/crops/historical/](https://opendata.dwd.de/climate_environment/CDC/observations_germany/phenology/annual_reporters/crops/historical/), 2023.
- Du, B., Arnold, J. G., Saleh, A., and Jaynes, D. B.: Development and application of SWAT to landscapes with tiles and potholes, *Transactions of the ASAE*, 48, 1121–1133, doi:10.13031/2013.18522, 2005.
- Eini, M. R., Salmani, H., and Piniewski, M.: Comparison of process-based and statistical approaches for simulation and projections of rainfed crop yields, *Agricultural Water Management*, 277, 108107, doi:10.1016/j.agwat.2022.108107, 2023.
- 805



- European Environment Agency: Climate change, impacts and vulnerability in Europe 2016: An indicator-based report, European Environment Agency, Luxembourg, EEA report, 1/2017, 2017.
- European Environment Agency: CORINE Land Cover 2018 (vector), Europe, 6-yearly - version 2020\_20u1,  
810 May 2020, European Environment Agency, 2020a.
- European Environment Agency: Imperviousness Density 2018 (raster 10 m), Europe, 3-yearly,  
<https://land.copernicus.eu/en/products/high-resolution-layer-imperviousness/imperviousness-density-2018>,  
2020b.
- European Environment Agency: European Climate Risk Assessment, 2024.
- 815 Faustzahlen für die Landwirtschaft, 14. Auflage, Kuratorium für Technik und Bauwesen in der Landwirtschaft  
e.V. KTBL, Darmstadt, 1180 pp., 2009.
- Field, C. B., Barros, V., Stocker, T. F., and Dahe, Q. (Eds.): Managing the Risks of Extreme Events and  
Disasters to Advance Climate Change Adaptation: Special Report of the Intergovernmental Panel on  
Climate Change, 1st ed., Cambridge University Press, 2012.
- 820 Förderverein Nationalpark Senne-Eggegebirge e.V.: Die neuen Wälder der Egge, [https://www.egge-  
nationalpark.de/de/02-Unsere-Region/Die-Egge/lebensraeume/lebensraeume-index.php](https://www.egge-nationalpark.de/de/02-Unsere-Region/Die-Egge/lebensraeume/lebensraeume-index.php), 2023.
- Gautam, K. and Corzo, G.: Evaluating the impact of ponds on flood and drought mitigation in the Bagmati River  
Basin, Nepal, *Hydrology Research*, 54, 1163–1180, doi:10.2166/nh.2023.050, 2023.
- Geologischer Dienst NRW: Bodenkarte von Nordrhein-Westfalen 1 50 000 – digital und analog,  
825 [https://www.gd.nrw.de/pr\\_kd\\_bodenkarte-50000.php](https://www.gd.nrw.de/pr_kd_bodenkarte-50000.php), 2023.
- Grillakis, M. G.: Increase in severe and extreme soil moisture droughts for Europe under climate change, *The  
Science of the Total Environment*, 660, 1245–1255, doi:10.1016/j.scitotenv.2019.01.001, 2019.
- Haas, H., Reaver, N. G. F., Karki, R., Kalin, L., Srivastava, P., Kaplan, D. A., and Gonzalez-Benecke, C.:  
Improving the representation of forests in hydrological models, *The Science of the Total Environment*, 812,  
830 151425, doi:10.1016/j.scitotenv.2021.151425, 2022.
- Haas, M. B., Guse, B., Pfannerstill, M., and Fohrer, N.: A joined multi-metric calibration of river discharge and  
nitrate loads with different performance measures, *Journal of Hydrology*, 536, 534–545,  
doi:10.1016/j.jhydrol.2016.03.001, 2016.
- Hargreaves, G. H. and Samani, Z. A.: Reference Crop Evapotranspiration from Temperature, *Applied  
835 Engineering in Agriculture*, 1, 96–99, doi:10.13031/2013.26773, 1985.
- Hari, V., Rakovec, O., Markonis, Y., Hanel, M., and Kumar, R.: Increased future occurrences of the exceptional  
2018-2019 Central European drought under global warming, *Scientific reports*, 10, 12207,  
doi:10.1038/s41598-020-68872-9, 2020.
- Harsch, N., Brandenburg, M., and Klemm, O.: Large-scale lysimeter site St. Arnold, Germany: analysis of 40  
840 years of precipitation, leachate and evapotranspiration, *Hydrol. Earth Syst. Sci.*, 13, 305–317,  
doi:10.5194/hess-13-305-2009, 2009.
- Harzer Tourismusverband e.V.: Hintergründe zur Waldsituation, [https://www.harzinfo.de/naturlandschaft-  
harz/initiative-der-wald-ruft/hintergruende](https://www.harzinfo.de/naturlandschaft-harz/initiative-der-wald-ruft/hintergruende).
- Herrmann, F. and Wendland, F.: Modellierung des Wasserhaushalts in Nordrhein-Westfalen mit mGROWA:  
845 Kooperationsprojekt GROWA+ NRW 2021, LANUV-Fachbericht 110 Teil IIa, Landesamt für Natur,  
Umwelt und Verbraucherschutz Nordrhein-Westfalen (LANUV), 81 pp., 2021.



- Holling, C. S.: Resilience and Stability of Ecological Systems, *Annu. Rev. Ecol. Syst.*, 4, 1–23, doi:10.1146/annurev.es.04.110173.000245, 1973.
- 850 Hoque, Y. M., Raj, C., Hantush, M. M., Chaubey, I., and Govindaraju, R. S.: How Do Land-Use and Climate Change Affect Watershed Health? A Scenario-Based Analysis, *Water Qual Expo Health*, 6, 19–33, doi:10.1007/s12403-013-0102-6, 2014.
- Howell, T. A., Evett, S. R., Tolk, J. A., Copeland, K. S., Colaizzi, P. D., and Gowda, P. H.: Evapotranspiration of Corn and Forage Sorghum for Silage, *American Society of Civil Engineers*, 1 pp., 2012.
- 855 Jahansouz, M. R., Afshar, R. K., Heidari, H., and Hashemi, M.: Evaluation of Yield and Quality of Sorghum and Millet as Alternative Forage Crops to Corn under Normal and Deficit Irrigation Regimes, *Jordan Journal of Agricultural Sciences*, 10, 2014.
- Jarrett, U., Miller, S., and Mohtadi, H.: Dry spells and global crop production: A multi-stressor and multi-timescale analysis, *Ecological Economics*, 203, 107627, doi:10.1016/j.ecolecon.2022.107627, 2023.
- 860 Kakouei, K., Kiesel, J., Domisch, S., Irving, K. S., Jähnig, S. C., and Kail, J.: Projected effects of Climate-change-induced flow alterations on stream macroinvertebrate abundances, *Ecology and evolution*, 8, 3393–3409, doi:10.1002/ece3.3907, 2018.
- Karki, R., Qi, J., Gonzalez-Benecke, C. A., Zhang, X., Martin, T. A., and Arnold, J. G.: SWAT-3PG: Improving forest growth simulation with a process-based forest model in SWAT, *Environmental Modelling & Software*, 164, 105705, doi:10.1016/j.envsoft.2023.105705, 2023.
- 865 Kassaye, S. M., Tadesse, T., Tegegne, G., and Hordofa, A. T.: Quantifying the climate change impacts on the magnitude and timing of hydrological extremes in the Baro River Basin, Ethiopia, *Environ Syst Res*, 13, doi:10.1186/s40068-023-00328-1, 2024.
- Kendall, M. G.: *Rank Correlation Methods*, Griffin, London, 1955.
- 870 Kiniry, J. R., Macdonald, J. D., Kemanian, A. R., Watson, B., Putz, G., and Prepas, E. E.: Plant growth simulation for landscape-scale hydrological modelling, *Hydrological Sciences Journal*, 53, 1030–1042, doi:10.1623/hysj.53.5.1030, 2008.
- Kling, H., Fuchs, M., and Paulin, M.: Runoff conditions in the upper Danube basin under an ensemble of climate change scenarios, *Journal of Hydrology*, 424–425, 264–277, doi:10.1016/j.jhydrol.2012.01.011, 2012.
- 875 Kreis Paderborn: Naturschutzgebiet „Eggeamm“: Kulturhistorische Besonderheiten, [https://www.kreis-paderborn.de/kreis\\_paderborn/geoportal/naturschutzgebiete/seiten/eggekamm/kulturhistorische-besonderheiten.php?catID=613171166055](https://www.kreis-paderborn.de/kreis_paderborn/geoportal/naturschutzgebiete/seiten/eggekamm/kulturhistorische-besonderheiten.php?catID=613171166055), 2024.
- Landesamt für Natur, Umwelt und Verbraucherschutz: 50 Jahre Großlysimeteranlage St. Arnold: Entwicklung der Klima- und Wasserhaushaltsgrößen bei unterschiedlicher Vegetation (1965-2014), *LANUV-Fachbericht* 91, 2018.
- 880 Landesvermessung NRW: Digitales Geländemodell NW Gitterweite 1m, Geobasis NRW, Bezirksregierung Köln, 2023.
- Landwirtschaftskammer Nordrhein-Westfalen: Historische beantragte und als förderfähig festgestellte Teilschläge in NRW, Landwirtschaftskammer Nordrhein-Westfalen, EU-Förderung, 2023.
- LANUV: GSK3E Gewässerstationierungskarte des Landes Nordrhein-Westfalen, Landesamt für Natur, Umwelt und Verbraucherschutz, 2019.
- 885 Liang, K., Zhang, X., Liang, X.-Z., Jin, V. L., Birru, G., Schmer, M. R., Robertson, G. P., McCarty, G. W., and Moglen, G. E.: Simulating agroecosystem soil inorganic nitrogen dynamics under long-term management



- with an improved SWAT-C model, *The Science of the Total Environment*, 879, 162906, doi:10.1016/j.scitotenv.2023.162906, 2023.
- 890 Lorenz, R., Stalhandske, Z., and Fischer, E. M.: Detection of a Climate Change Signal in Extreme Heat, Heat Stress, and Cold in Europe From Observations, *Geophysical Research Letters*, 46, 8363–8374, doi:10.1029/2019GL082062, 2019.
- Mann, H. B.: Nonparametric tests against trend, *Econometrica*, 13, 245–259, 1945.
- Marx, A., Kumar, R., Thober, S., Rakovec, O., Wanders, N., Zink, M., Wood, E. F., Pan, M., Sheffield, J., and  
895 Samaniego, L.: Climate change alters low flows in Europe under global warming of 1.5, 2, and 3 °C, *Hydrol. Earth Syst. Sci.*, 22, 1017–1032, doi:10.5194/hess-22-1017-2018, 2018.
- McKay, M. D.: Sensitivity and uncertainty analysis using a statistical sample of input values, in: *Sensitivity and Uncertainty Analysis Using a Statistical Sample of Input Values: Uncertainty Analysis*, Ronen, Y. (Ed.), CRC Press, Boca Raton, Florida, 145–186, 1988.
- 900 McKay, M. D., Beckman, R. J., and Conover, W. J.: A comparison of three methods for selecting values of input variables in the analysis of output from a computer code, *Technometrics*, 42, 55–61, 2000.
- McKee, T. B., Doesken, N. J., and Kleist, J.: *The Relationship of Drought Frequency and Duration to Time Scales.*, 1993.
- Menzel, L.: Hydrologische Extreme: Dürren, in: *Hydrologie*, 1. Auflage, Fohrer, N., Bormann, H., Miegel, K.,  
905 Casper, M., Bronstert, A., Schumann, A. H., Weiler, M. (Eds.), UTB basics, 4513, Haupt Verlag, Bern, 223–228, 2016.
- Ministerium für Umwelt, Naturschutz und Verkehr NRW: elektronisches wasserwirtschaftliches Verbundsystem für die Wasserwirtschaftsverwaltung in NRW (ELWAS), <https://www.elwasweb.nrw.de/elwasweb/data/ow/menge/pegel/pegelDetailsTab.xhtml?jsessionid=6F590982A3F253A68974CFDD9A433015?cid=1#>, 2024.
- 910 Mishra, A. K. and Singh, V. P.: A review of drought concepts, *Journal of Hydrology*, 391, 202–216, doi:10.1016/j.jhydrol.2010.07.012, 2010.
- Moriassi, D. N., Arnold, J. G., van Liew, M. W., Bingner, R. L., Harmel, R. D., and Veith, T. L.: Model Evaluation Guidelines for Systematic Quantification of Accuracy in Watershed Simulations, *Transactions of the ASABE*, 50, 885–900, doi:10.13031/2013.23153, 2007.
- 915 Müller, E. V.: Analysis of forest-specific ecosystem services with regard to water balance components: Runoff and groundwater recharge in the forest, *Landesforsten Rheinland-Pfalz, Trier*, 238 pp., 2022.
- Müller, J.: 30 Jahre Großlysimeteranlage in Britz - Zielstellung und Ergebnisse, 11. Gumpensteiner Lysimetertagung, *Irdning*, 5.-6.04.2005, 29–32, 2005.
- 920 Müller, J.: The use of lysimeters to determine the water balance in forests in northeastern Germany, *Forest Ecology, Landscape Research and Nature Conservation*, 37–46, 2011.
- Naik, M. and Abiodun, B. J.: Modelling the potential of land use change to mitigate the impacts of climate change on future drought in the Western Cape, South Africa, *Theor Appl Climatol*, 155, 6371–6392, doi:10.1007/s00704-024-04995-7, 2024.
- 925 Nash, J. E. and Sutcliffe, J. V.: River flow forecasting through conceptual models part I — A discussion of principles, *Journal of Hydrology*, 10, 282–290, doi:10.1016/0022-1694(70)90255-6, 1970.
- Nationalparkverwaltung Harz: Die Wälder des Nationalparks: Kern einer neuen Wildnis, <https://www.nationalpark-harz.de/de/der-nationalpark-harz/lebensraeume/waelder/>.



- 930 Nauta, S. M., Waterloo, M. J., Gevaert, A. I., Bijl, J. de, and Brotherton, P.: Micro-Catchments, Macro Effects: Natural Water Retention Measures in the Kylldal Catchment, Germany, *Water*, 16, 733, doi:10.3390/w16050733, 2024.
- Neitsch, S. L., Arnold, J. G., Kiniry, J. R., and Williams, J. R.: Soil and Water Assessment Tool: Theoretical Documentation, Version 2009, 2011.
- 935 Northcott, W., Cooke, R. A., Walker, S. E., Mitchell, J. K., and Hirschi, M. C. (Eds.): Modeling Flow on a Tile-Drained Watershed using a GIS integrated DRAINMOD, 2002.
- Paez-Trujillo, A., Corzo, G. A., Maskey, S., and Solomatine, D.: Model-Based Assessment of Preventive Drought Management Measures' Effect on Droughts Severity, *Water*, 15, 1442, doi:10.3390/w15081442, 2023.
- 940 Parajuli, P. B., Jayakody, P., Sassenrath, G. F., and Ouyang, Y.: Assessing the impacts of climate change and tillage practices on stream flow, crop and sediment yields from the Mississippi River Basin, *Agricultural Water Management*, 168, 112–124, doi:10.1016/j.agwat.2016.02.005, 2016.
- Pfannerstill, M., Guse, B., and Fohrer, N.: Smart low flow signature metrics for an improved overall performance evaluation of hydrological models, *Journal of Hydrology*, 510, 447–458, doi:10.1016/j.jhydrol.2013.12.044, 2014.
- 945 Placatová, R., Papaj, V., Fučík, P., Brázda, J., Páček, L., and Tlustoš, P.: Evaluation of the Long-Term Water Balance in Selected Crop Rotations with Alfalfa in a Soil-Heterogeneous Lowland Region of the Czech Republic, *Agronomy*, 14, 1692, doi:10.3390/agronomy14081692, 2024.
- Pohlert, T.: trend: Non-Parametric Trend Tests and Change-Point Detection, R-Package, 2023.
- 950 Rakovec, O., Samaniego, L., Hari, V., Markonis, Y., Moravec, V., Thober, S., Hanel, M., and Kumar, R.: The 2018–2020 Multi-Year Drought Sets a New Benchmark in Europe, *Earth's Future*, 10, doi:10.1029/2021EF002394, 2022.
- Rauthe, M., Steiner, H., Riediger, U., Mazurkiewicz, A., and Gratzki, A.: A Central European precipitation climatology. Part I: Generation and validation of a high-resolution gridded daily data set (HYRAS), *metz*, 22, 235–256, doi:10.1127/0941-2948/2013/0436, 2013.
- 955 Razafimaharo, C., Krähenmann, S., Höpp, S., Rauthe, M., and Deuschländer, T.: New high-resolution gridded dataset of daily mean, minimum, and maximum temperature and relative humidity for Central Europe (HYRAS), *Theor Appl Climatol*, 142, 1531–1553, doi:10.1007/s00704-020-03388-w, 2020.
- Riedel, T., Nolte, C., Beek, T. aus der, Liedtke, J., Sures, B., and Grabner, D.: Niedrigwasser, Dürre und Grundwasserneubildung: Bestandsaufnahme zur gegenwärtigen Situation in Deutschland, den Klimaprojektionen und den existierenden Maßnahmen und Strategien, 310 pp., 2021.
- 960 Ryan, J. A., Ulrich, J. M., Bennett, R., and Joy, C.: xts: eXtensible Time Series, R package, 2024.
- Salomón, R. L., Peters, R. L., Zweifel, R., Sass-Klaassen, U. G. W., Stegehuis, A. I., Smiljanic, M., Poyatos, R., Babst, F., Cienciala, E., Fonti, P., Lerink, B. J. W., Lindner, M., Martinez-Vilalta, J., Mencuccini, M., Nabuurs, G.-J., van der Maaten, E., Arx, G. von, Bär, A., Akhmetzyanov, L., Balanzategui, D., Bellan, M., Bendix, J., Berveiller, D., Blaženc, M., Čada, V., Carraro, V., Cecchini, S., Chan, T., Conedera, M., Delpierre, N., Delzon, S., Ditmarová, L., Dolezal, J., Dufrêne, E., Edvardsson, J., Ehekircher, S., Forner, A., Frouz, J., Ganthaler, A., Gryc, V., Güney, A., Heinrich, I., Hentschel, R., Janda, P., Ježik, M., Kahle, H.-P., Knüsel, S., Krejza, J., Kuberski, Ł., Kučera, J., Lebourgeois, F., Mikoláš, M., Matula, R., Mayr, S., Oberhuber, W., Obojes, N., Osborne, B., Paljakka, T., Plichta, R., Rabbal, I., Rathgeber, C. B. K., Salmon,



- 970 Y., Saunders, M., Scharnweber, T., Sitková, Z., Stangler, D. F., Stereńczak, K., Stojanović, M., Střelcová, K., Světlík, J., Svoboda, M., Tobin, B., Trotsiuk, V., Urban, J., Valladares, F., Vavrčík, H., Vejvustková, M., Walthert, L., Wilmking, M., Zin, E., Zou, J., and Steppe, K.: The 2018 European heatwave led to stem dehydration but not to consistent growth reductions in forests, *Nature communications*, 13, 28, doi:10.1038/s41467-021-27579-9, 2022.
- 975 Samaniego, L., Thober, S., Kumar, R., Wanders, N., Rakovec, O., Pan, M., Zink, M., Sheffield, J., Wood, E. F., and Marx, A.: Anthropogenic warming exacerbates European soil moisture droughts, *Nature Clim Change*, 8, 421–426, doi:10.1038/s41558-018-0138-5, 2018.
- Schaffasz, A., Windpassinger, S., Friedt, W., Snowdon, R., and Wittkop, B.: Sorghum as a Novel Crop for Central Europe: Using a Broad Diversity Set to Dissect Temperate-Adaptation, *Agronomy*, 9, 535, doi:10.3390/agronomy9090535, 2019.
- 980 Schuerz, C.: SWATrunR: Running SWAT2012 and SWAT+ Projects in R, R package, 2024.
- Schüler, G.: Identification of flood-generating forest areas and forestry measures for water retention, *Forest Snow and Landscape Research*, 80, 99–114, 2006.
- Sen, P. K.: Estimates of the Regression Coefficient Based on Kendall's Tau, *Journal of the American Statistical Association*, 63, 1379, doi:10.2307/2285891, 1968.
- 985 Soetaert, K. and Petzoldt, T.: Inverse Modelling, Sensitivity and Monte Carlo Analysis in R Using Package FME, *J. Stat. Soft.*, 33, 1–28, doi:10.18637/jss.v033.i03, 2010.
- Sohn, W., Kim, J.-H., Li, M.-H., Brown, R. D., and Jaber, F. H.: How does increasing impervious surfaces affect urban flooding in response to climate variability?, *Ecological Indicators*, 118, 106774, doi:10.1016/j.ecolind.2020.106774, 2020.
- 990 Sorooshian, S., Duan, Q., and Gupta, V. K.: Calibration of rainfall-runoff models: Application of global optimization to the Sacramento Soil Moisture Accounting Model, *Water Resources Research*, 29, 1185–1194, doi:10.1029/92WR02617, 1993.
- Srivastav, A. L., Dhyani, R., Ranjan, M., Madhav, S., and Sillanpää, M.: Climate-resilient strategies for sustainable management of water resources and agriculture, *Environmental science and pollution research international*, 28, 41576–41595, doi:10.1007/s11356-021-14332-4, 2021.
- 995 Statistisches Bundesamt - Destatis: Daten aus dem Gemeindeverzeichnis Kreisfreie Städte und Landkreise nach Fläche, Bevölkerung und Bevölkerungsdichte, Gebietsstand: 31.12.2022, 2023.
- Statmüller, J. and Meesenburg, H.: Einfluss von forstlicher Bestandesentwicklung und Klimawandel auf Wasserhaushaltskomponenten im Einzugsgebiet der Langen Bramke im Harz, *Hydrologie und Wasserbewirtschaftung*, 62, doi:10.5675/HyWa\_2018,3\_5, 2018.
- 1000 Tetzlaff, B.: Ausweisung potenziell dränerter Flächen unter landwirtschaftlicher Nutzung in Nordrhein-Westfalen: LANUV-Fachbericht 110, Kooperationsprojekt GROWA+ NRW 2021, 33 pp., 2021.
- UFZ Helmholtz Zentrum für Umweltforschung: Dürremonitor Deutschland, <https://www.ufz.de/index.php?de=37937>, 2024.
- 1005 United States Department of Agriculture: Chapter 7 Hydrologic Soil Groups, Part 630 Hydrology, *National Engineering Handbook*, 210-VI-NEH, 2009.
- United States Department of Agriculture: Soil survey manual. USDA Handbook 18. Government Printing Office., Washington, D.C., 2017.

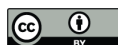

- 1010 Valtera, M. and Schaetzl, R. J.: Pit-mound microrelief in forest soils: Review of implications for water retention and hydrologic modelling, *Forest Ecology and Management*, 393, 40–51, doi:10.1016/j.foreco.2017.02.048, 2017.
- van Loon, A. F.: Hydrological drought explained, *WIREs Water*, 2, 359–392, doi:10.1002/wat2.1085, 2015.
- van Vliet, M. T. H., Sheffield, J., Wiberg, D., and Wood, E. F.: Impacts of recent drought and warm years on  
1015 water resources and electricity supply worldwide, *Environ. Res. Lett.*, 11, 124021, doi:10.1088/1748-9326/11/12/124021, 2016.
- Vicente-Serrano, S. M., Beguería, S., and López-Moreno, J. I.: A Multiscalar Drought Index Sensitive to Global Warming: The Standardized Precipitation Evapotranspiration Index, *Journal of Climate*, 23, 1696–1718, doi:10.1175/2009JCLI2909.1, 2010.
- 1020 Vorobevskii, I., Luong, T. T., Kronenberg, R., and Petzold, R.: High-resolution operational soil moisture monitoring for forests in central Germany, *Hydrol. Earth Syst. Sci.*, 28, 3567–3595, doi:10.5194/hess-28-3567-2024, 2024.
- Wagner, P. D., Kumar, S., and Fohrer, N.: Integrated modeling of global change impacts on land and water resources, *The Science of the Total Environment*, 892, 164673, doi:10.1016/j.scitotenv.2023.164673, 2023.
- 1025 Wagner, P. D., Saba, F., Achanccaray, P., and Fohrer, N.: Drought-induced land use and land cover change impacts on hydrology: Insights from the Harz mountains, Germany, *Hydrol. Earth Syst. Sci.*, Preprint, doi:10.5194/egusphere-2025-3091, 2025.
- Walker, B., Holling, C. S., Carpenter, S. R., and Kinzig, A. P.: Resilience, Adaptability and Transformability in Social-ecological Systems, *E&S*, 9, doi:10.5751/ES-00650-090205, 2004.
- 1030 Wang, K., Onodera, S., Saito, M., and Shimizu, Y.: Long-term variations in water balance by increase in percent imperviousness of urban regions, *Journal of Hydrology*, 602, 126767, doi:10.1016/j.jhydrol.2021.126767, 2021.
- Wasserverband Obere Lippe: Hochwasserrückhaltebecken, <https://www.wol-nrw.de/hochwasserschutz/hochwasserrueckhaltebecken/>, 2024.
- 1035 Weiler, M. and Miegel, K.: Globaler und regionaler Wasserkreislauf, in: *Hydrologie*, 1. Auflage, Fohrer, N., Bormann, H., Miegel, K., Casper, M., Bronstert, A., Schumann, A. H., Weiler, M. (Eds.), UTB basics, 4513, Haupt Verlag, Bern, 2016.
- Wilbrand, K.: Identifikation von Potentialen für den dezentralen Wasserrückhalt im Wald, *Tag der Hydrologie*, Augsburg, 20/03/2025, 2025.
- 1040 Wilhite, D. A., Pulwarty, R. S., and Wilhite, D.: *Drought and Water Crises*, CRC Press, Second edition. | Boca Raton CRC Press, 2018. | 1st edition published in 2005., 2017.
- Wong, N. H., Tan, C. L., Kolokotsa, D. D., and Takebayashi, H.: Greenery as a mitigation and adaptation strategy to urban heat, *Nat Rev Earth Environ*, 2, 166–181, doi:10.1038/s43017-020-00129-5, 2021.
- Yang, J., Winrich, A., Zhang, T., Qiao, L., Mattingly, C., and Zou, C.: Responses of streamflow to forest  
1045 expansion in a typical subhumid watershed under future climate conditions, *Journal of environmental management*, 357, 120780, doi:10.1016/j.jenvman.2024.120780, 2024.
- Yang, Q. and Zhang, X.: Improving SWAT for simulating water and carbon fluxes of forest ecosystems, *The Science of the Total Environment*, 569-570, 1478–1488, doi:10.1016/j.scitotenv.2016.06.238, 2016.
- Yapo, P. O., Gupta, H. V., and Sorooshian, S.: Automatic calibration of conceptual rainfall-runoff models:  
1050 sensitivity to calibration data, *Journal of Hydrology*, 181, 23–48, doi:10.1016/0022-1694(95)02918-4, 1996.



- Yilmaz, K. K., Gupta, H. V., and Wagener, T.: A process-based diagnostic approach to model evaluation: Application to the NWS distributed hydrologic model, *Water Resources Research*, 44, doi:10.1029/2007WR006716, 2008.
- Zambrano-Bigiarini, M.: hydroGOF: Goodness-of-fit functions for comparison of simulated and observed hydrological time series, Zenodo, 2024.
- 1055
- Zeileis, A. and Grothendieck, G.: zoo: S3 Infrastructure for Regular and Irregular Time Series, *J. Stat. Soft.*, 14, doi:10.18637/jss.v014.i06, 2005.
- Zölch, T., Henze, L., Keilholz, P., and Pauleit, S.: Regulating urban surface runoff through nature-based solutions - An assessment at the micro-scale, *Environmental research*, 157, 135–144, doi:10.1016/j.envres.2017.05.023, 2017.
- 1060
